# Supplementary material for: Lycorine Carbamate Derivatives for Reversing P-glycoprotein-Mediated Multidrug Resistance in Human Colon Adenocarcinoma Cells
Source: MDPI journal article supplement (doi:10.3390/ijms24032061), 2023-01-20
Supplement: s1 [file s1]

# Supporting information

## **Lycorine carbamate derivatives for reversing P-glycoprotein mediated multidrug resistance in human colon adenocarcinoma cancer cells.**

**Shirley A. R. Sancha<sup>1</sup>, Nikoletta Szemerédi<sup>2</sup>, Gabriella Spengler<sup>2</sup>, and Maria-José U. Ferreira<sup>1\*</sup>**

<sup>1</sup> Research Institute for Medicines (iMed.Ulisboa), Faculty of Pharmacy, Universidade de Lisboa, Av. Prof. Gama Pinto, 1649-003 Lisbon, Portugal.

<sup>2</sup> Department of Medical Microbiology, Albert Szent-Györgyi Health Center, Faculty of Medicine, University of Szeged, Semmelweis utca 6, 6725 Szeged, Hungary

**\*Corresponding author:** Maria-José U. Ferreira; Email: [mjuferreira@ff.ulisboa.pt](mailto:mjuferreira@ff.ulisboa.pt).

## Table of contents

|                                                                      |     |
|----------------------------------------------------------------------|-----|
| 1. NMR data of parental compound 1.....                              | S3  |
| 2. Representative $^1\text{H}$ and $^{13}\text{C}$ NMR spectra ..... | S4  |
| 3. Rhodamine-123 accumulation assay (compounds 1 – 32) .....         | S19 |
| 4. Flow cytometry data.....                                          | S21 |
| 6. Combination chemotherapy results.....                             | S26 |
| 7. Physicochemical properties.....                                   | S27 |
| 8. Pharmacokinetic properties.....                                   | S28 |
| 9. References .....                                                  | S29 |

## 1. NMR data of parental compound 1

### Lycorine (1)

Amorphous powder.  $[\alpha]_D^{25} - 70.6$  (*c* 0.31, MeOH); IR  $\nu_{\max}$  cm<sup>-1</sup> (KBr): 3334, 1485, 744. ESI-MS (positive mode) *m/z* (rel. int) 288 [M + H]<sup>+</sup> (100). <sup>1</sup>H NMR (300 MHz, DMSO-*d*<sub>6</sub>)  $\delta$  6.80 (1H, *s*, H-10), 6.67 (1H, *s*, H-7), 5.95 (2H, *dd*, *J* = 4.1, 0.9 Hz, OCH<sub>2</sub>O), 5.37 (1H, *bs*, H-3), 4.85 (1H, *d*, *J* = 6.2 Hz, 2-OH), 4.75 (1H, *d*, *J* = 4.2 Hz, 1-OH), 4.27 (1H *bs*, H-1), 4.04 (1H, *d*, *J* = 14.2 Hz, H-6 $\beta$ ), 3.96 (1H, *bs*, H-2), 3.29 (1H, *d*, *J* = 14.2 Hz, H-6 $\alpha$ ), 3.18 (1H, *ddd*, *J* = 9.1, 7.2, 2.1 Hz, H12- $\beta$ ), 2.61 (1H, *d*, *J* = 10.4 Hz, H-10b), 2.51 (1H, *m*, H-4a), 2.47 (2H, *m*, H-11), 2.20 (1H, *q*, *J* = 8.5 Hz, H-12 $\alpha$ ) ppm. <sup>13</sup>C NMR (75 MHz, DMSO- *d*<sub>6</sub>)  $\delta$  145.6 (C-9), 145.1(C-8), 141.6 (C-4), 129.7(C-6a), 129.5(C-10a), 118.4 (C-3), 106.9 (C-7), 105.0 (C-10), 100.5 (OCH<sub>2</sub>O), 71.7 (C-2), 70.2 (C-1), 60.7 (C-4a), 56.7 (C-6), 53.2 (C-12), 40.1(C-10b), 28.1 (C-11) ppm.

## 2. Representative $^1\text{H}$ and $^{13}\text{C}$ NMR spectra

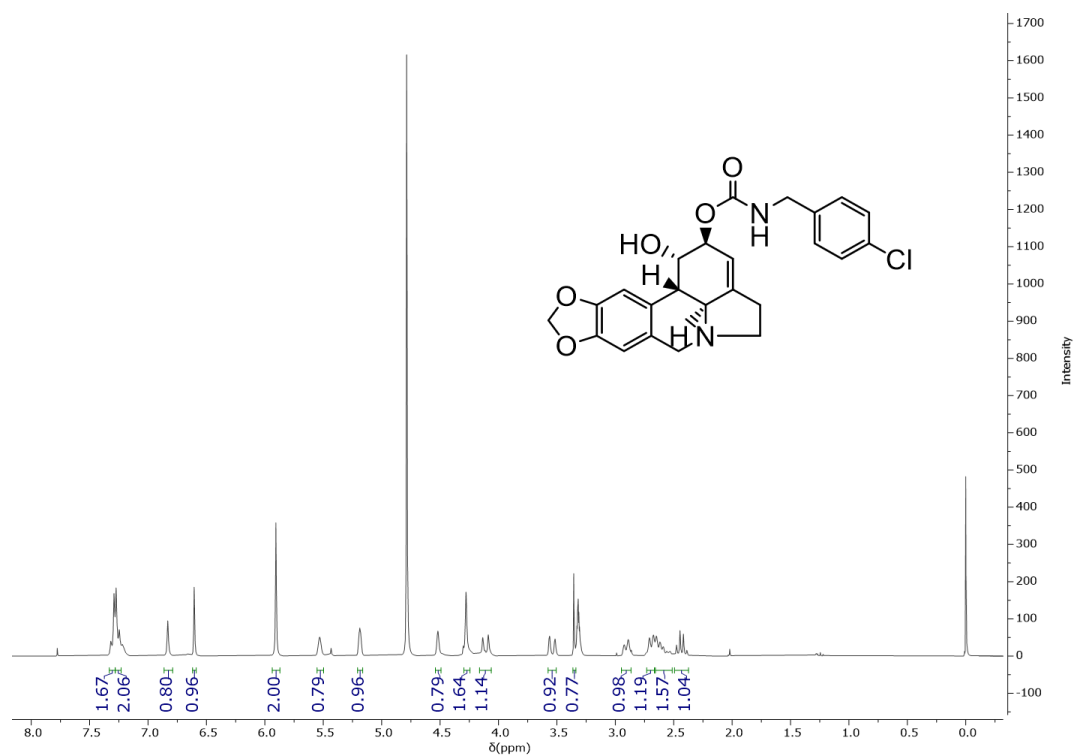

Figure S1:  $^1\text{H}$ -NMR spectrum of compound 2 (300 MHz,  $\text{CDCl}_3/\text{CD}_3\text{OD}$ ).

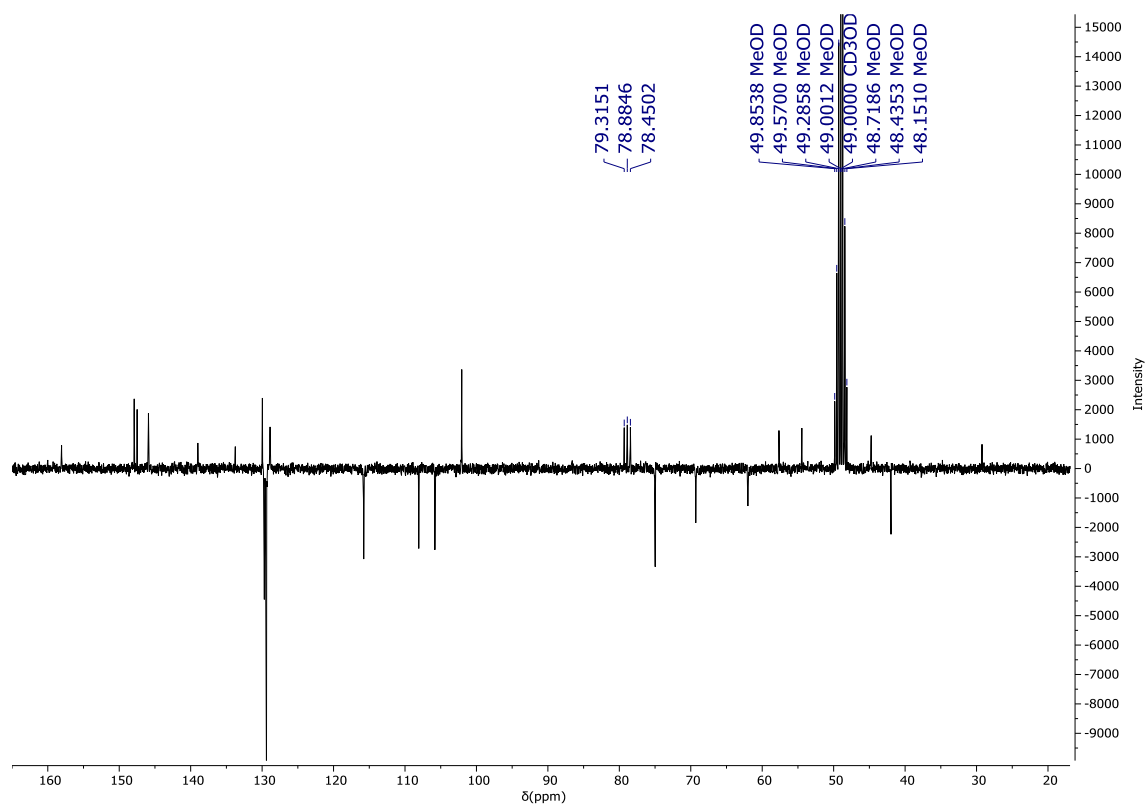

Figure S2:  $^{13}\text{C}$ -APT NMR spectrum of compound 2 (75 MHz,  $\text{CDCl}_3/\text{CD}_3\text{OD}$ ).

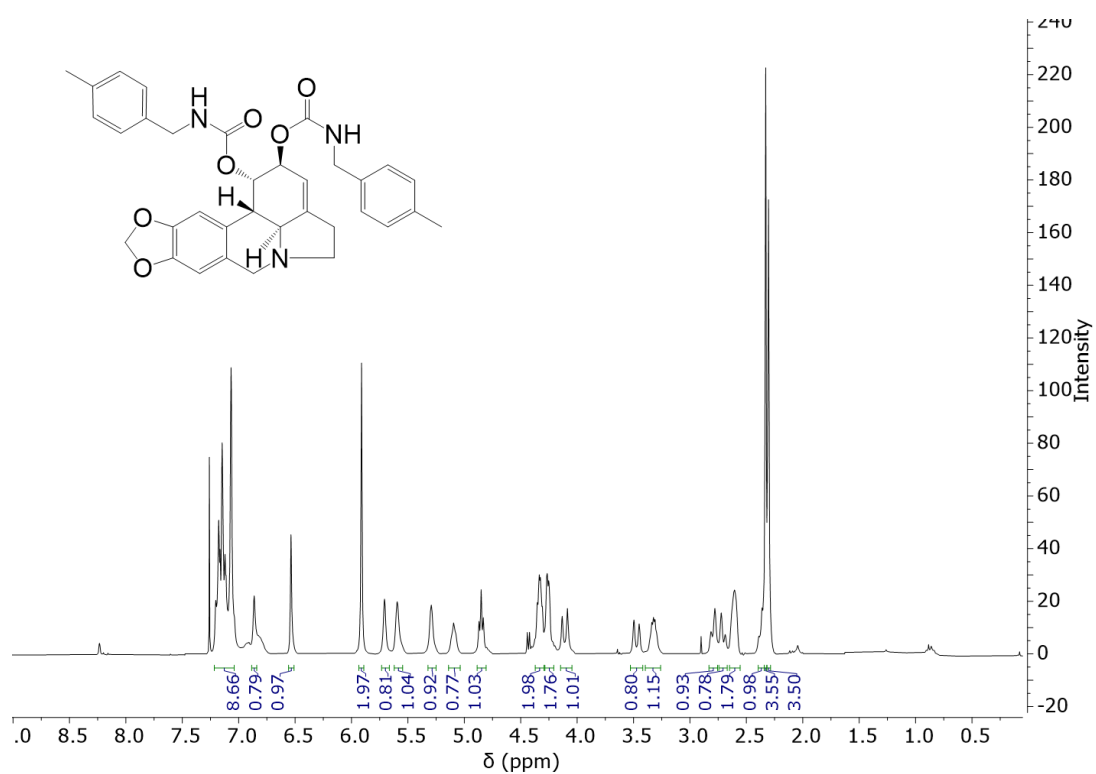

**Figure S3:** <sup>1</sup>H-NMR spectrum of compound 5 (300 MHz, CDCl<sub>3</sub>).

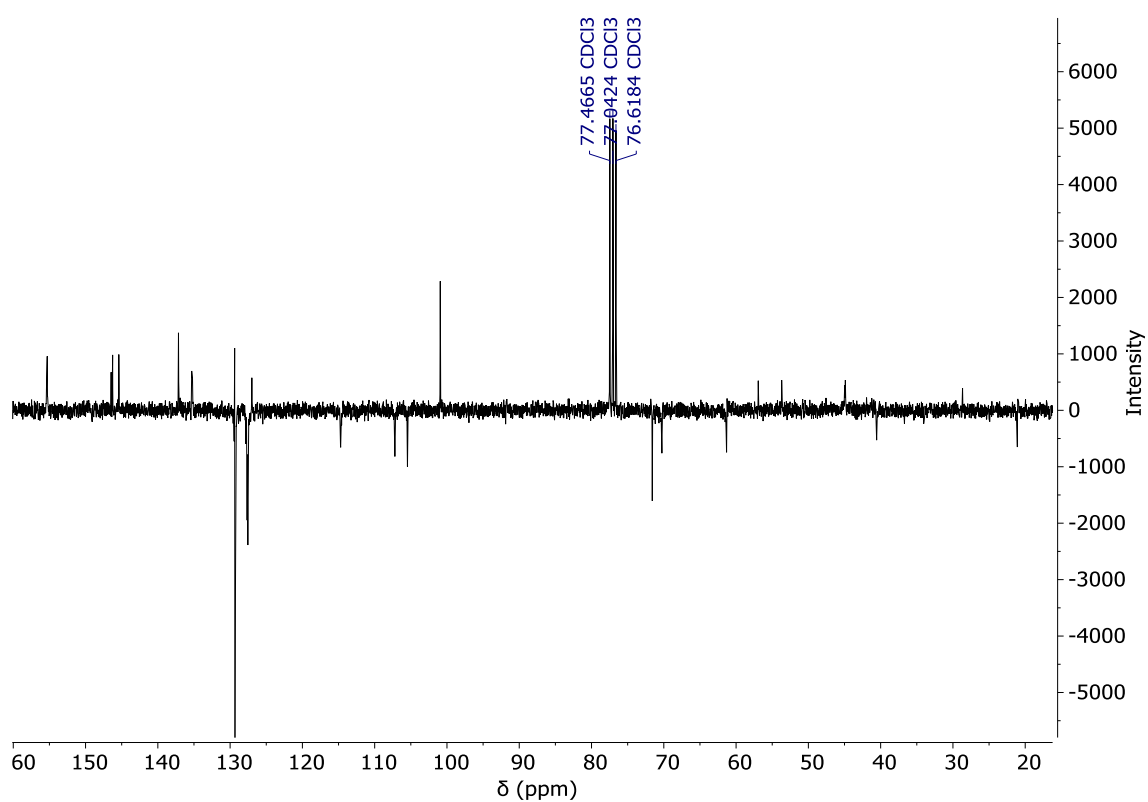

**Figure S4:** <sup>13</sup>C-APT NMR spectrum of compound 5 (75 MHz, CDCl<sub>3</sub>).

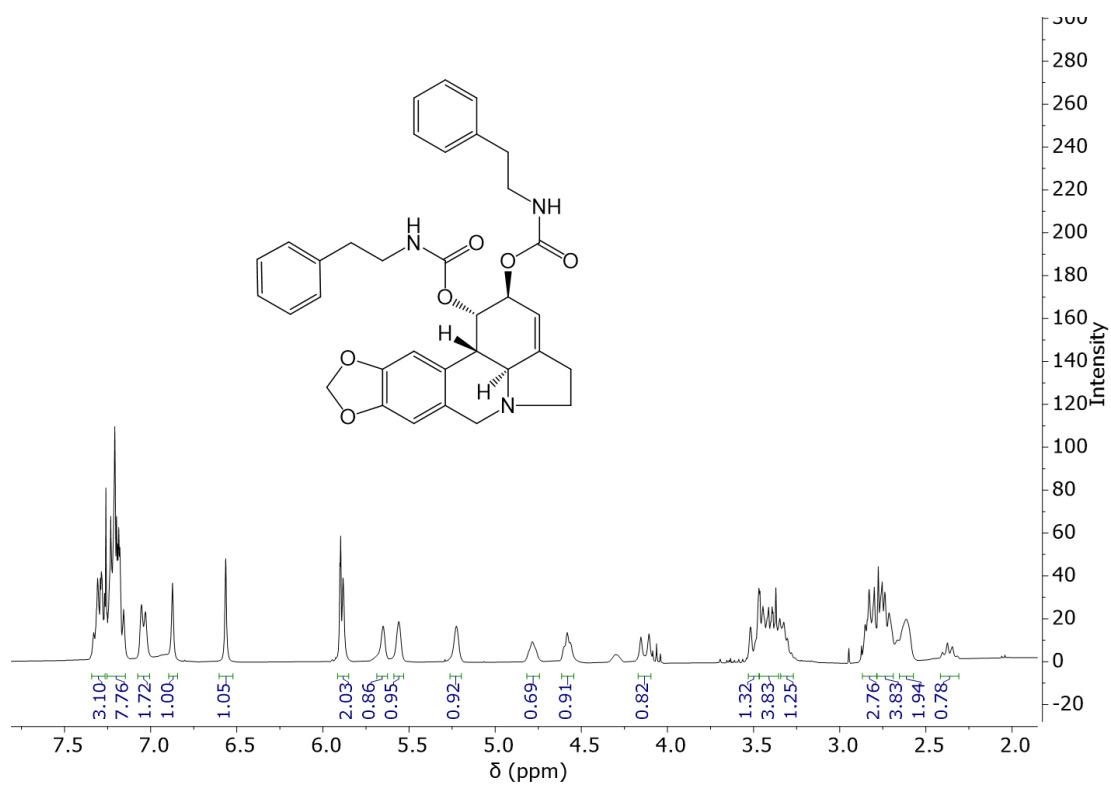

Figure S5: <sup>1</sup>H-NMR spectrum of compound 9 (300 MHz, CDCl<sub>3</sub>).

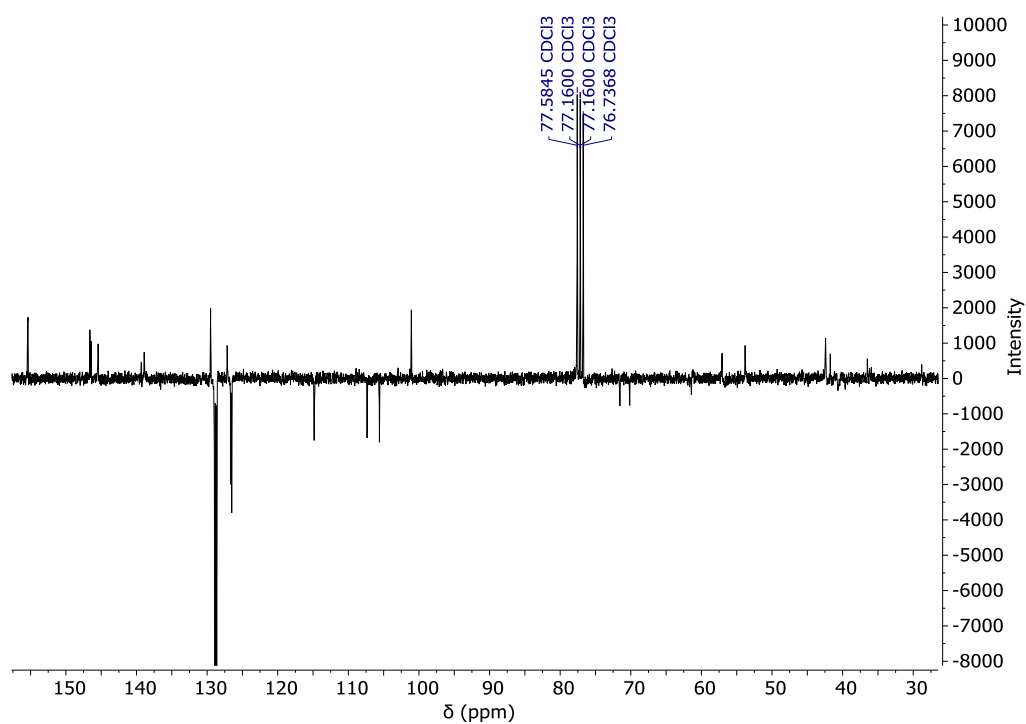

Figure S6: <sup>13</sup>C-APT NMR spectrum of compound 9 (75 MHz, CDCl<sub>3</sub>).

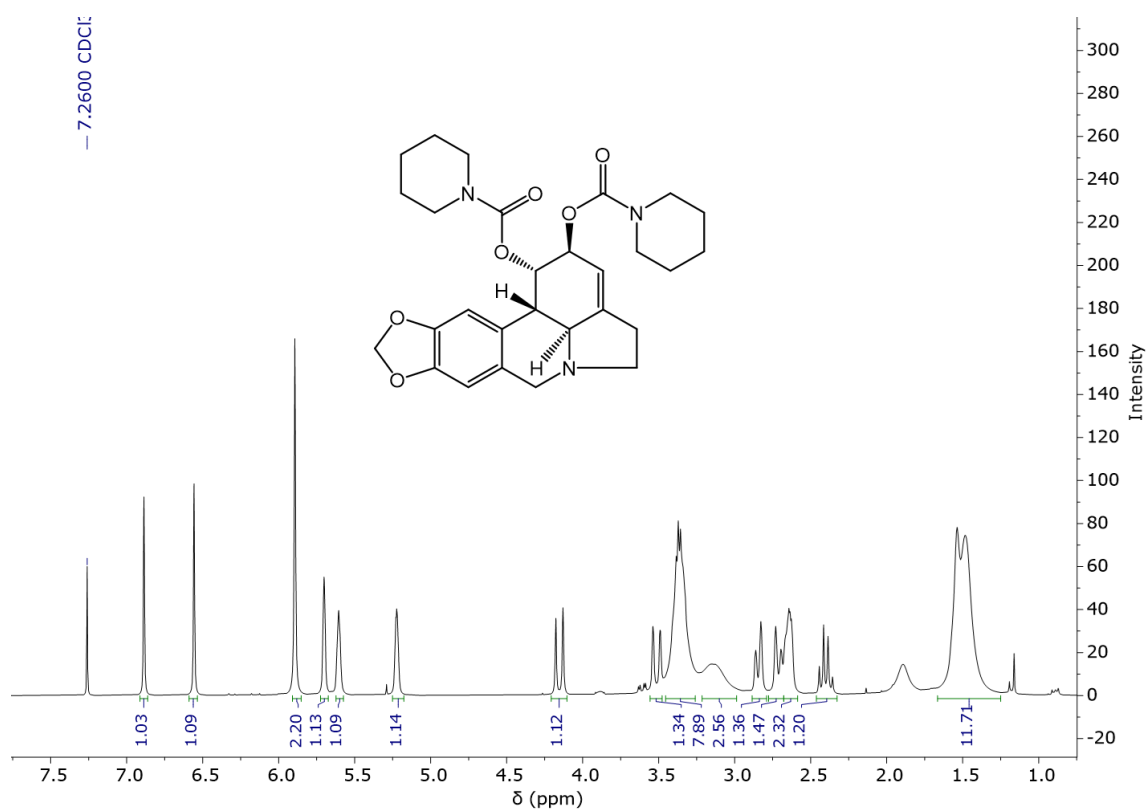

**Figure S7:** <sup>1</sup>H-NMR spectrum of compound **16** (300 MHz, CDCl<sub>3</sub>).

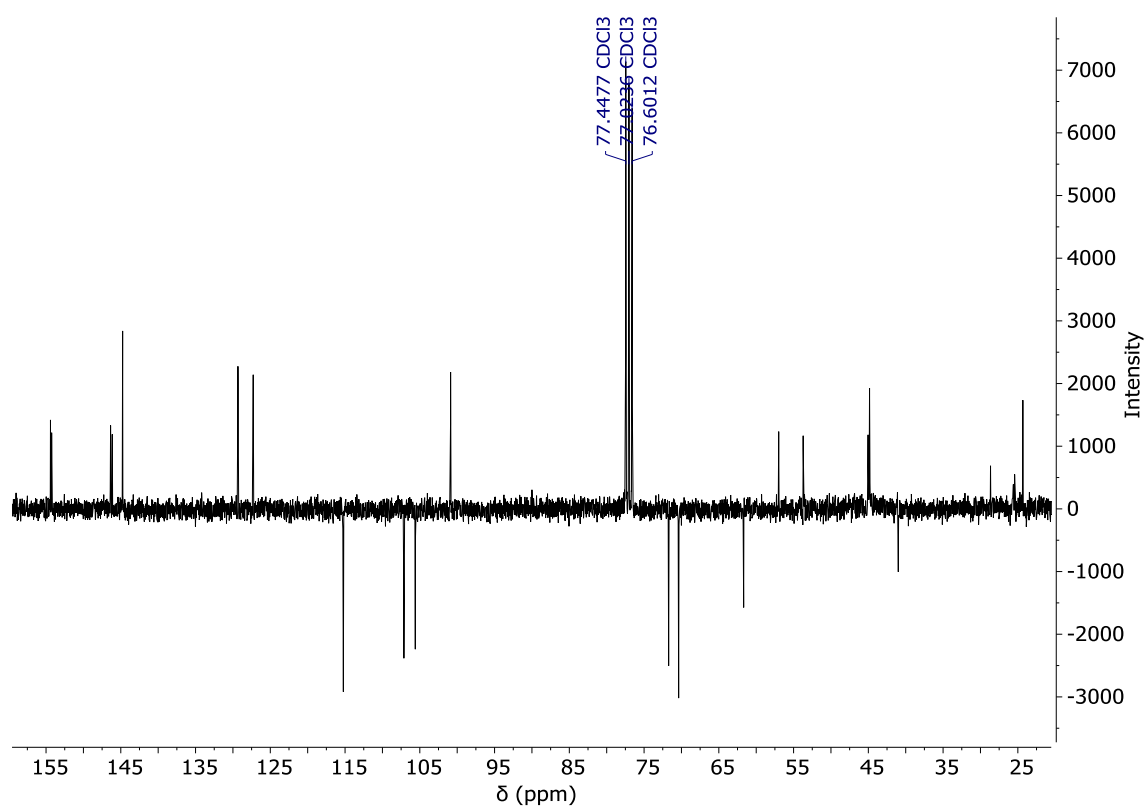

**Figure S8:** <sup>13</sup>C-APT NMR spectrum of compound **16** (75 MHz, CDCl<sub>3</sub>).

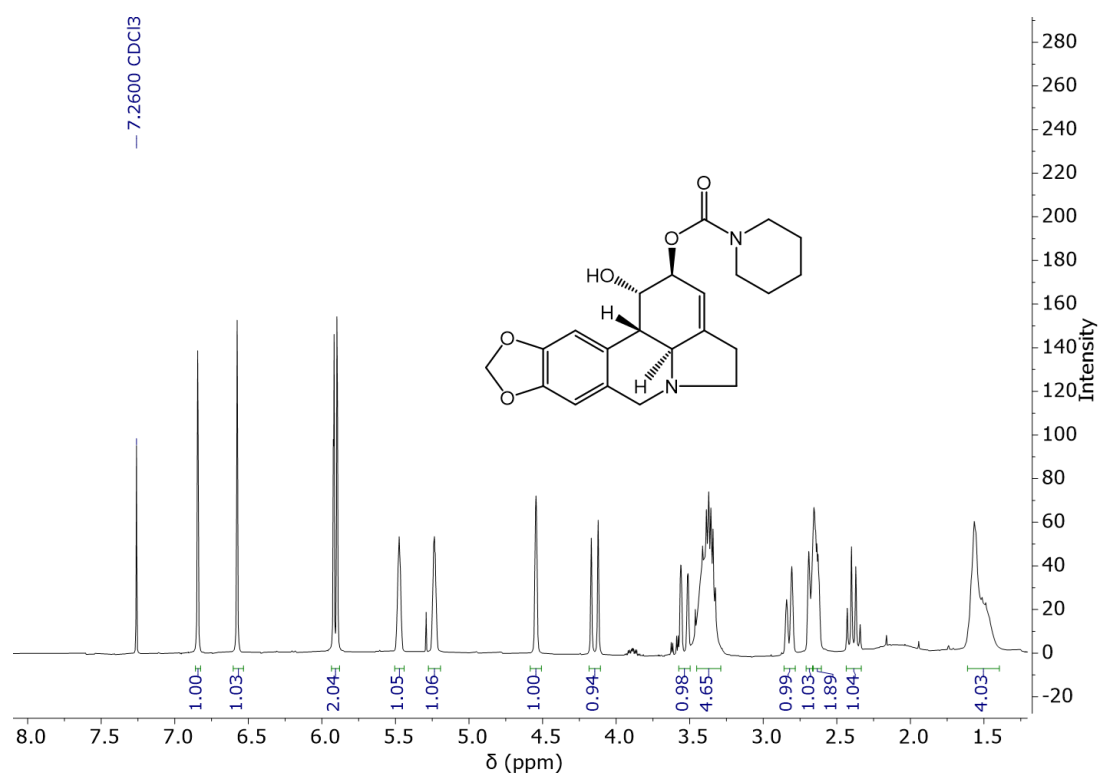

**Figure S9:** <sup>1</sup>H-NMR spectrum of compound 17 (300 MHz, CDCl<sub>3</sub>).

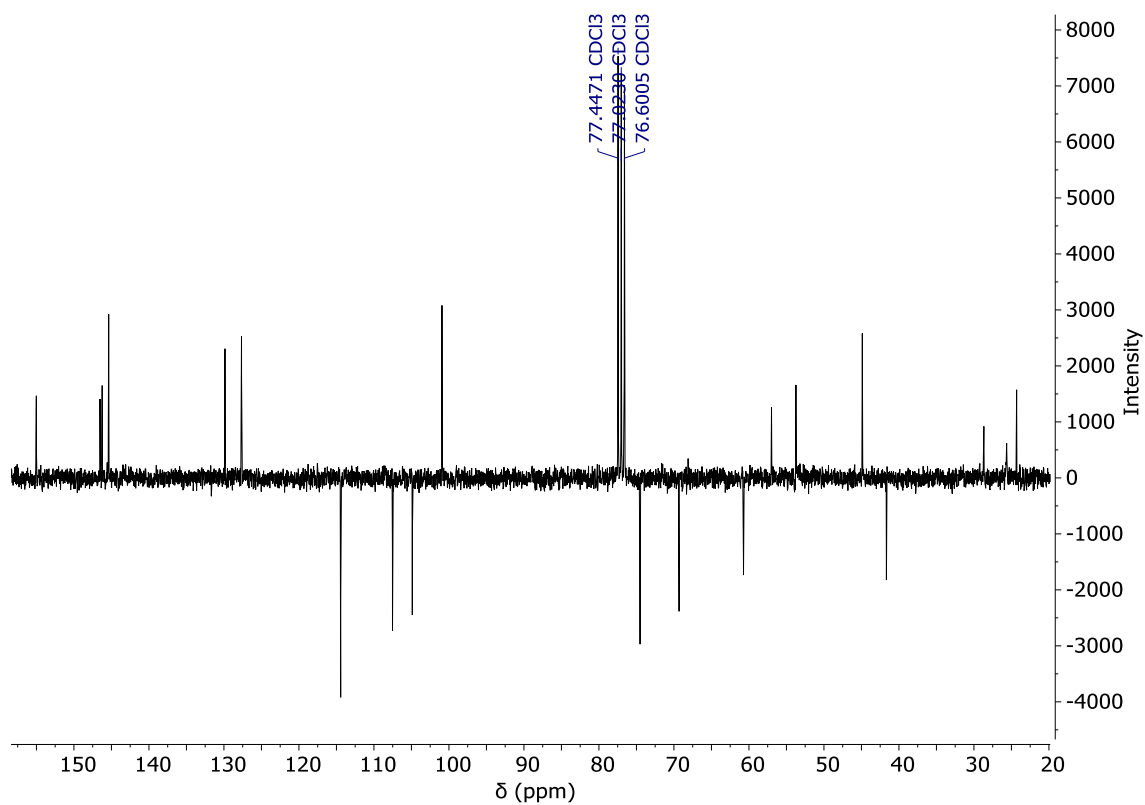

**Figure S10:** <sup>13</sup>C-APT NMR spectrum of compound 17 (75 MHz, CDCl<sub>3</sub>).



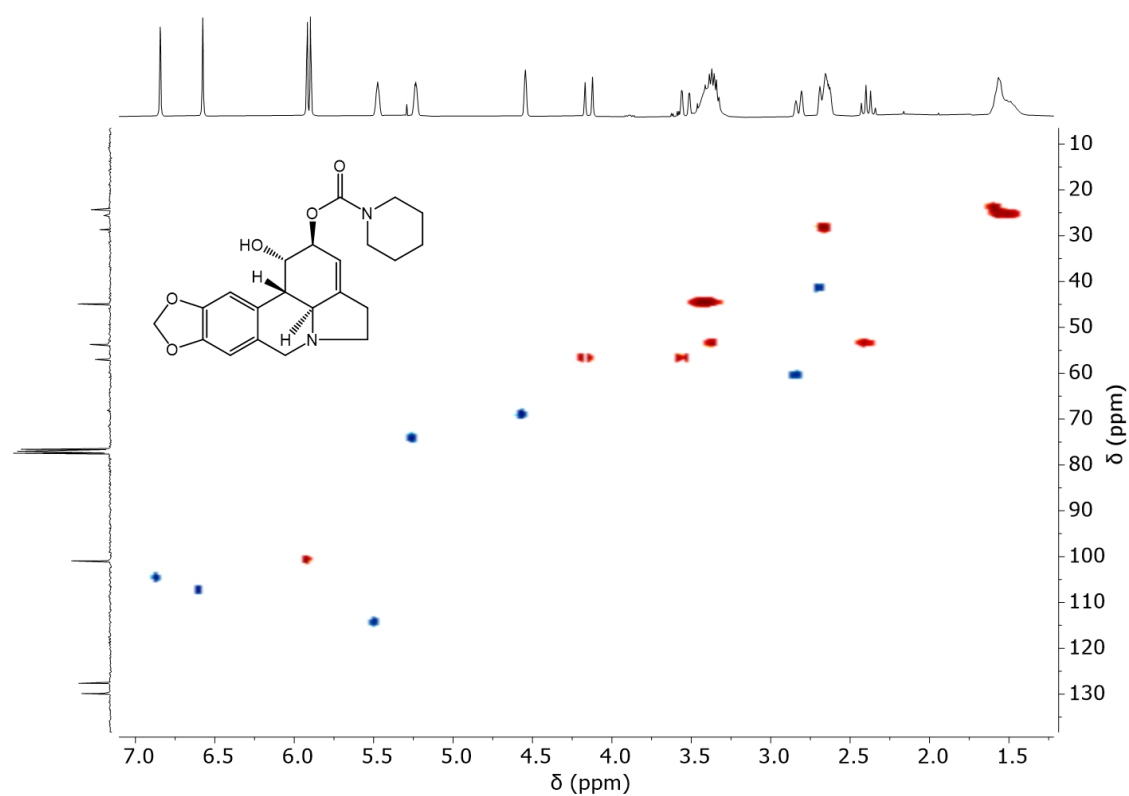

**Figure S11:** HSQC spectrum of compound 17.

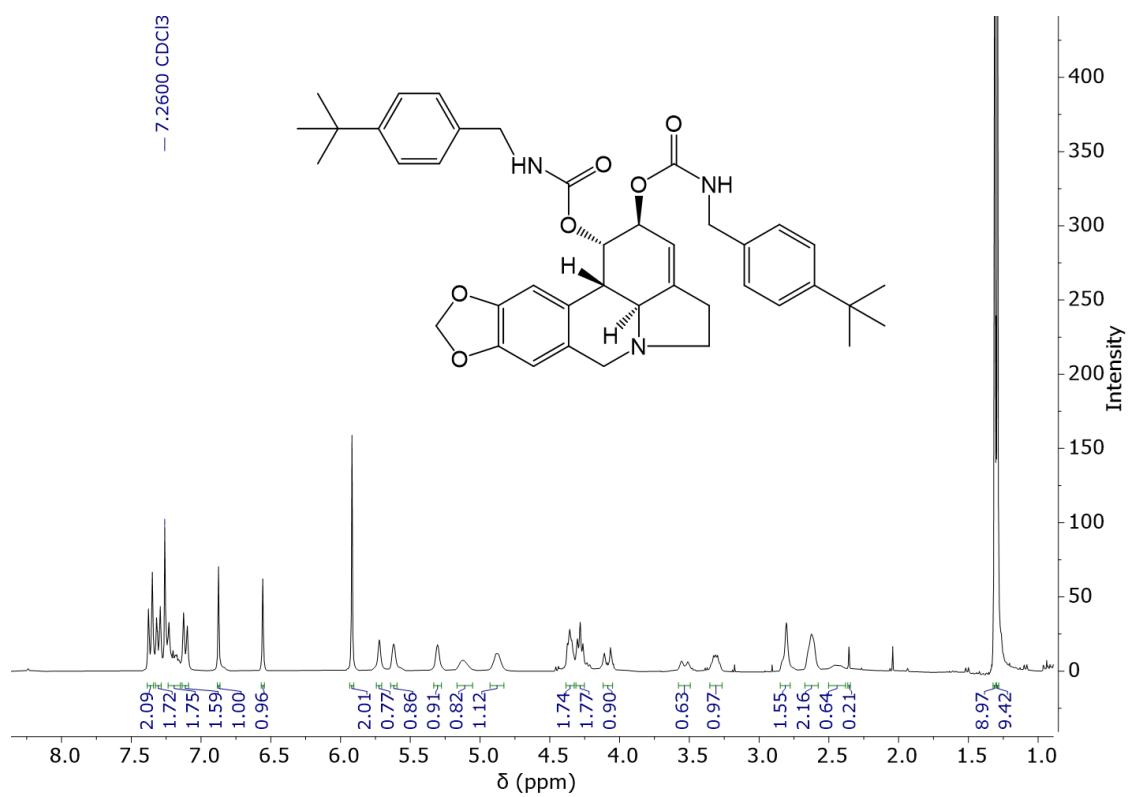

**Figure S12:**  $^1\text{H}$ -NMR spectrum of compound 18 (300 MHz,  $\text{CDCl}_3$ ).

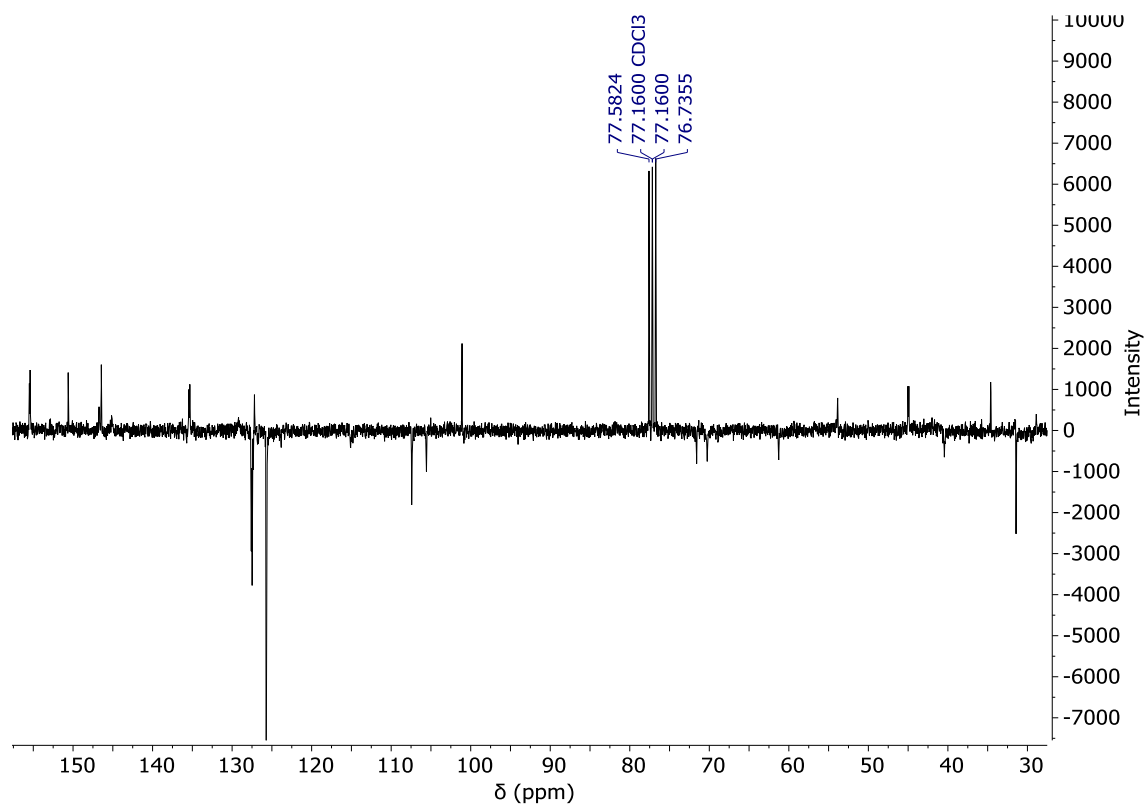

**Figure S13:**  $^{13}\text{C}$ -APT NMR spectrum of compound **18** (75 MHz,  $\text{CDCl}_3$ ).

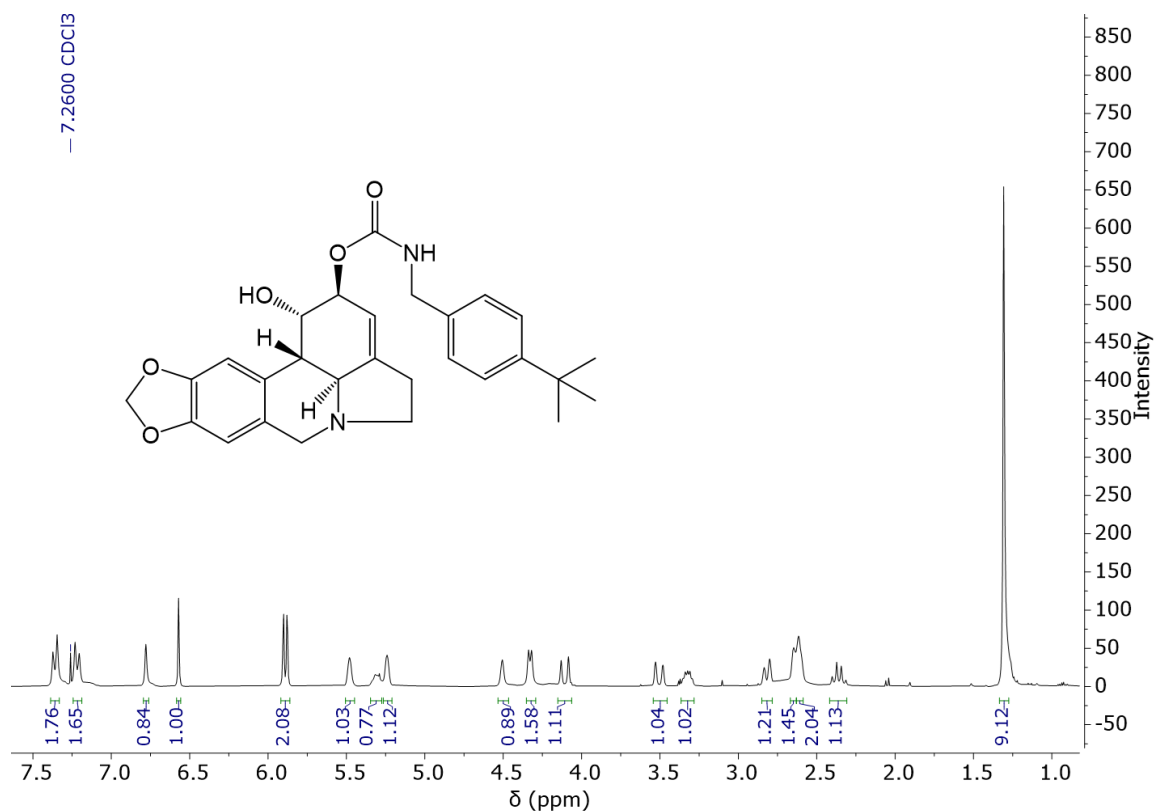

**Figure S14:**  $^1\text{H}$ -NMR spectrum of compound **19** (300 MHz,  $\text{CDCl}_3$ ).

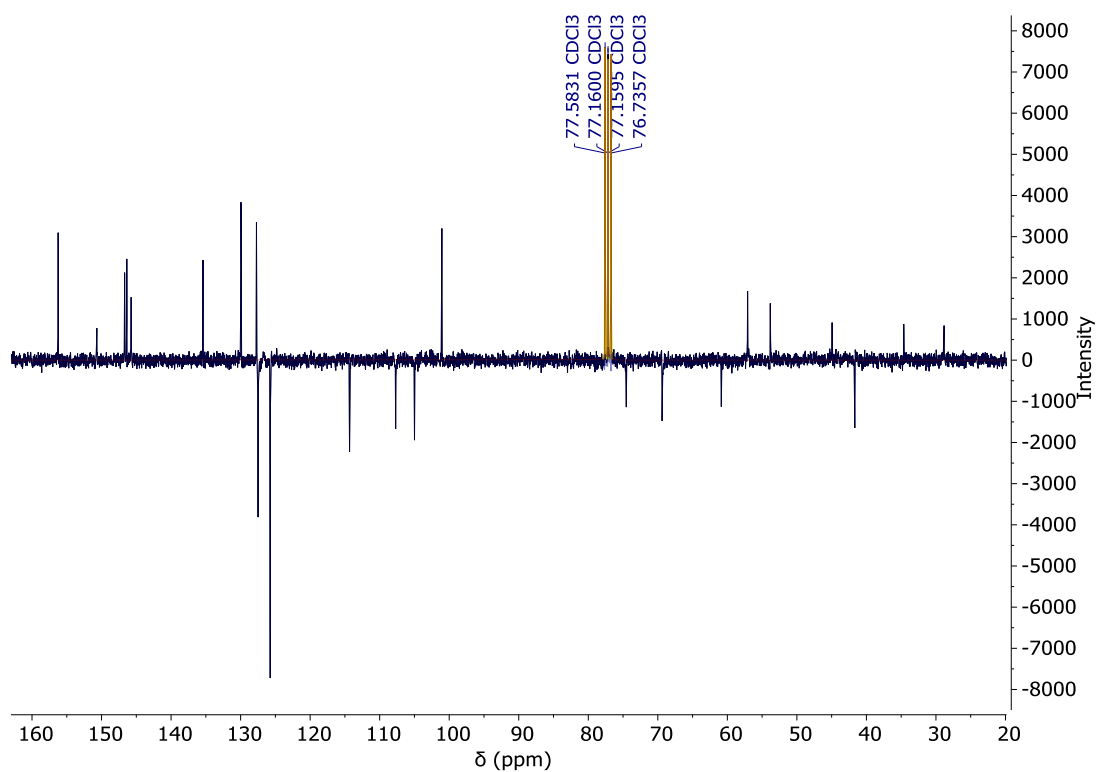

**Figure S15:**  $^{13}\text{C}$ -APT NMR spectrum of compound **19** (75 MHz,  $\text{CDCl}_3$ ).

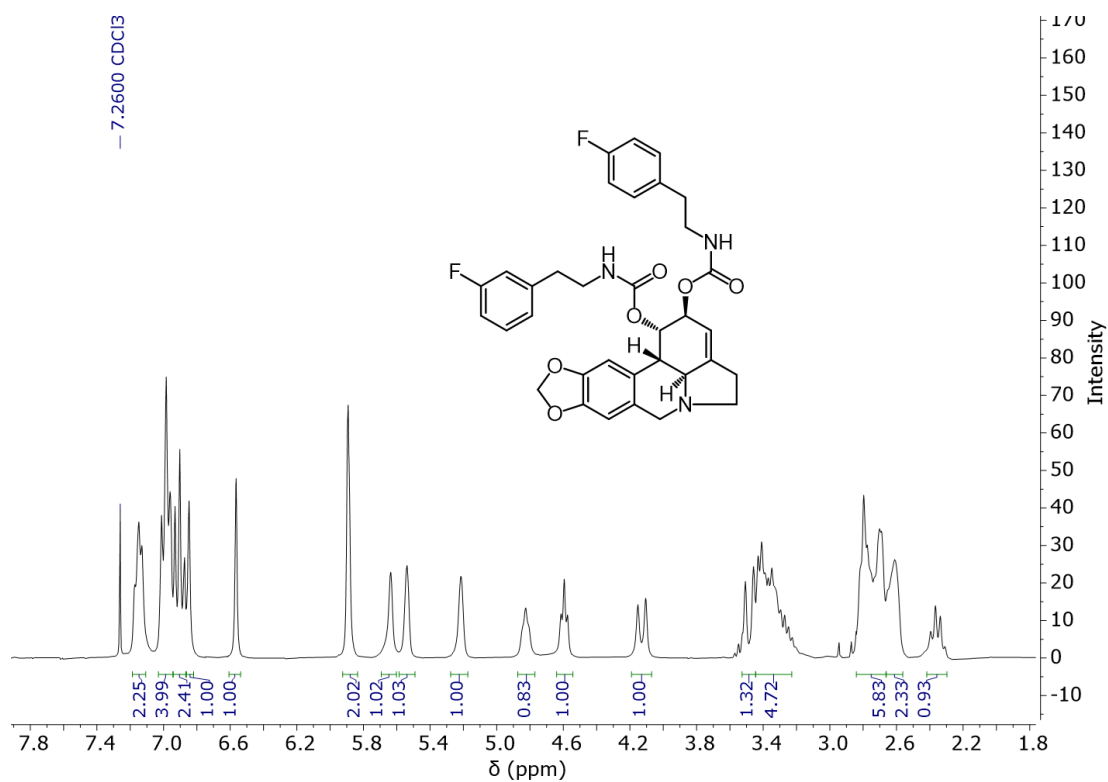

**Figure S16:**  $^1\text{H}$ -NMR spectrum of compound **23** (300 MHz,  $\text{CDCl}_3$ ).

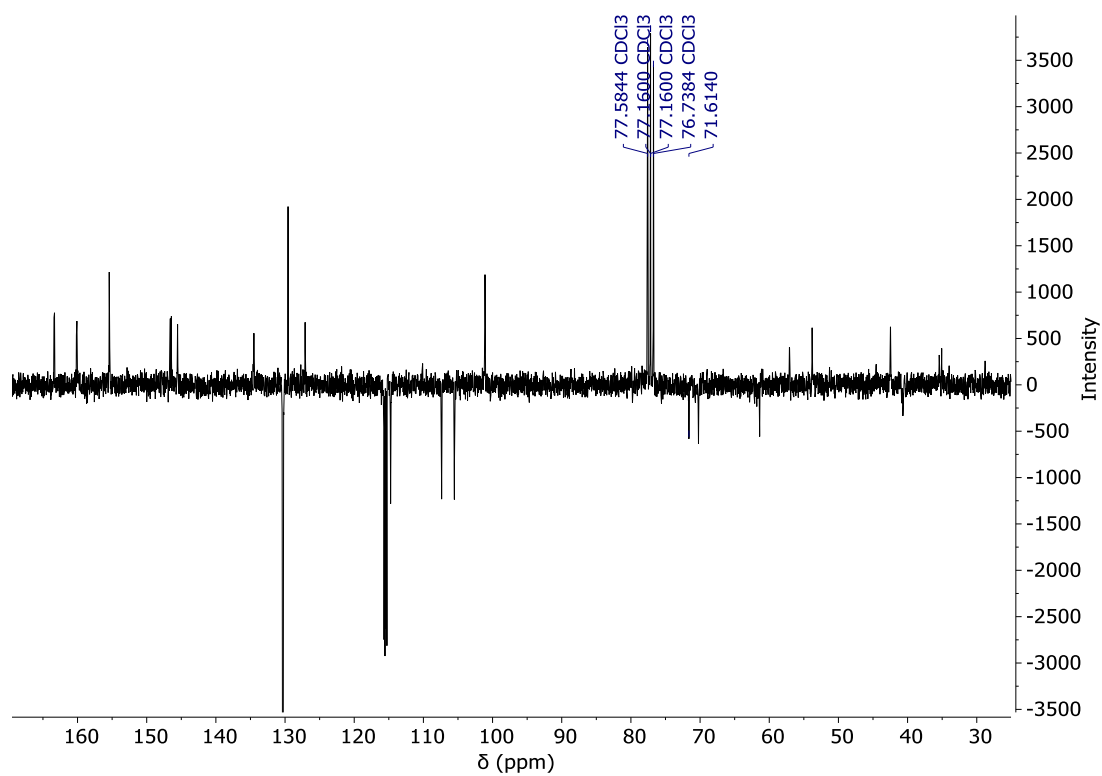

**Figure S17:**  $^{13}\text{C}$ -APT NMR spectrum of compound **23** (75 MHz,  $\text{CDCl}_3$ ).

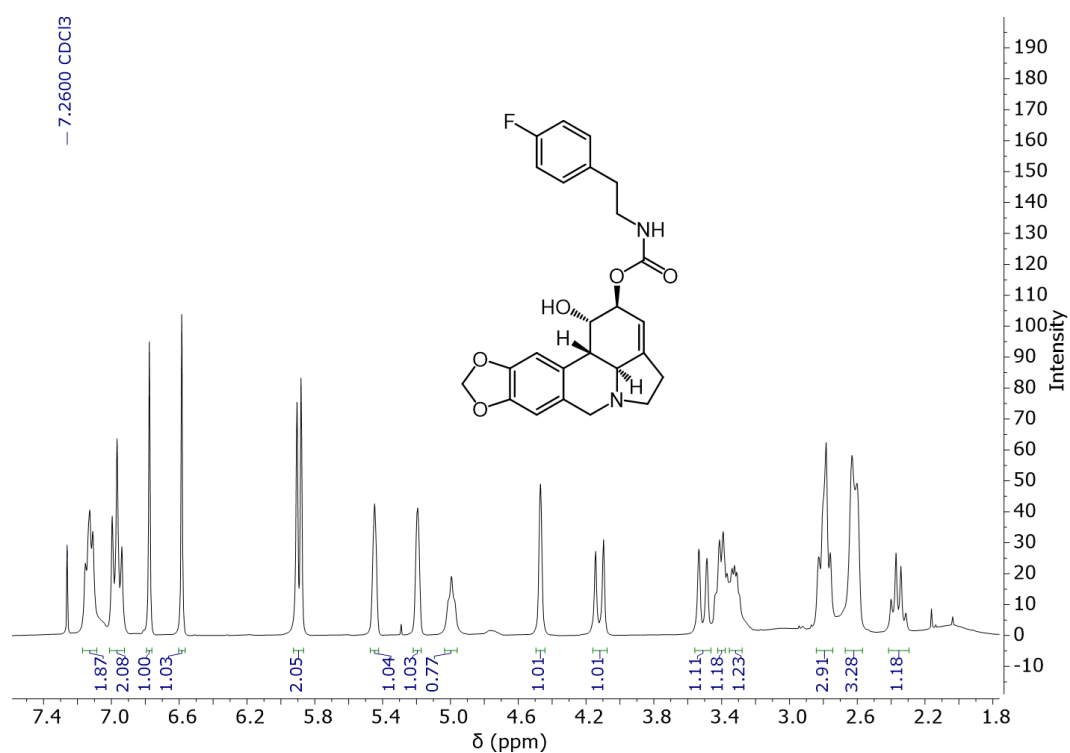

**Figure S18:**  $^1\text{H}$ -NMR spectrum of compound **24** (300 MHz,  $\text{CDCl}_3$ ).

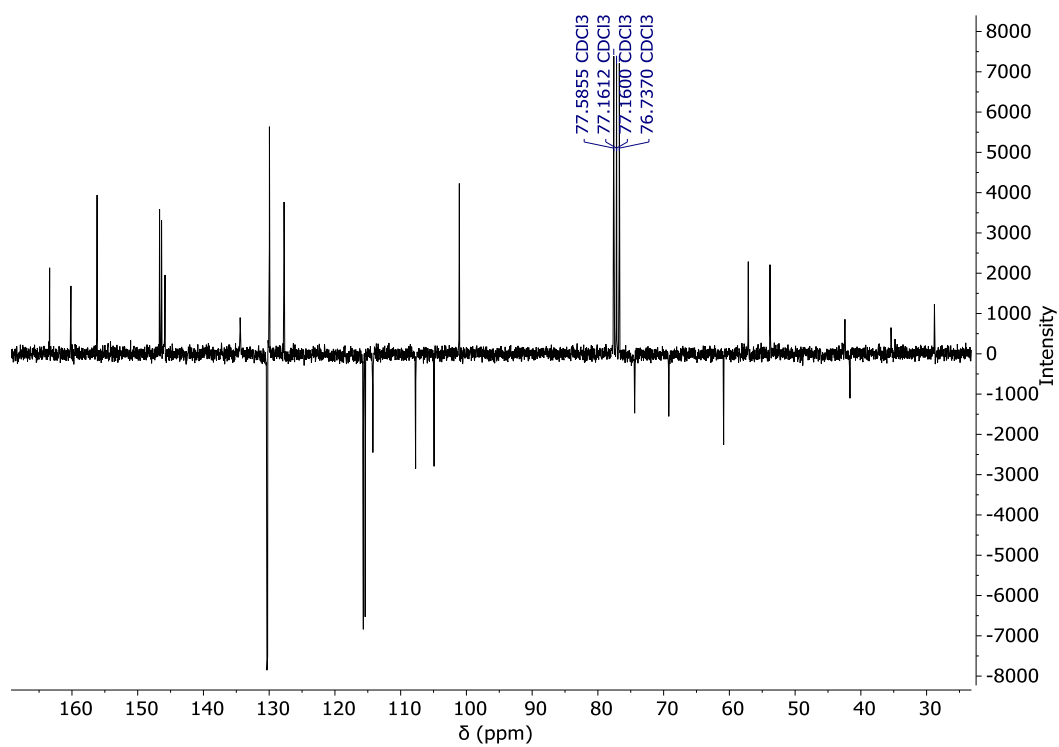

**Figure S19:**  $^{13}\text{C}$ -APT NMR spectrum of compound **24** (75 MHz,  $\text{CDCl}_3$ ).

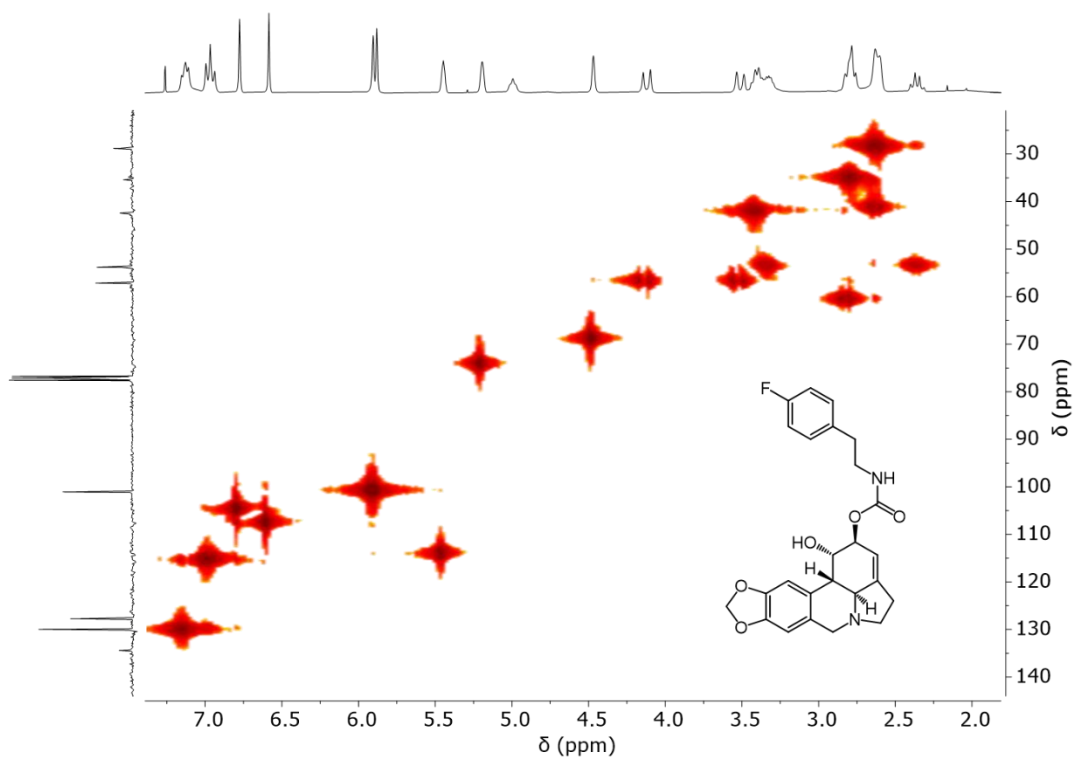

**Figure S20:** HMQC spectrum of compound **24**.

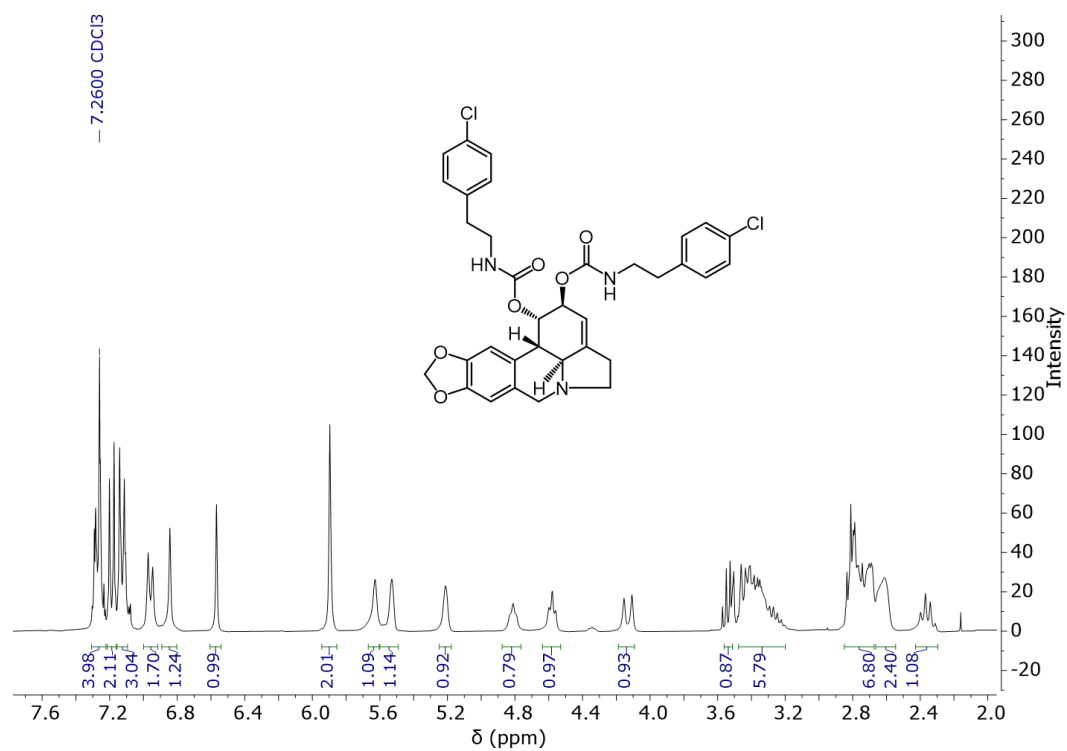

**Figure S21:**  $^1\text{H}$ -NMR spectrum of compound **25** (300 MHz,  $\text{CDCl}_3$ ).

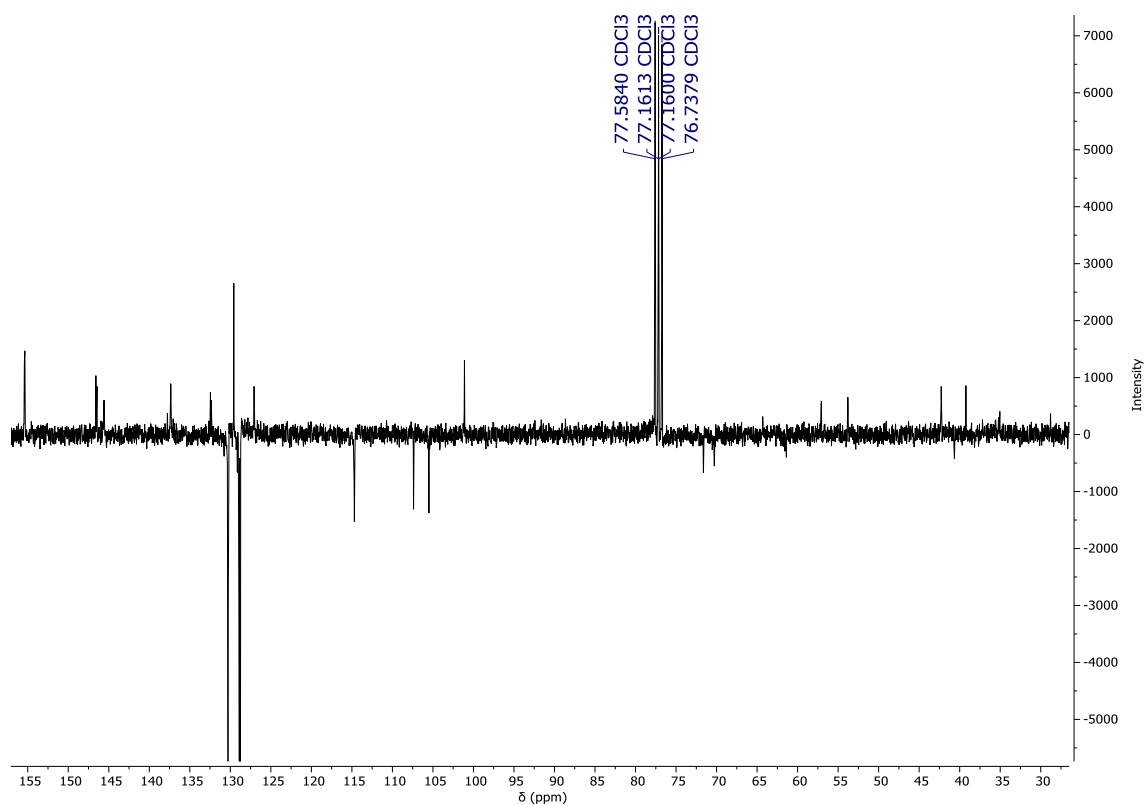

**Figure S22:**  $^{13}\text{C}$ -APT NMR spectrum of compound **25** (75 MHz,  $\text{CDCl}_3$ ).

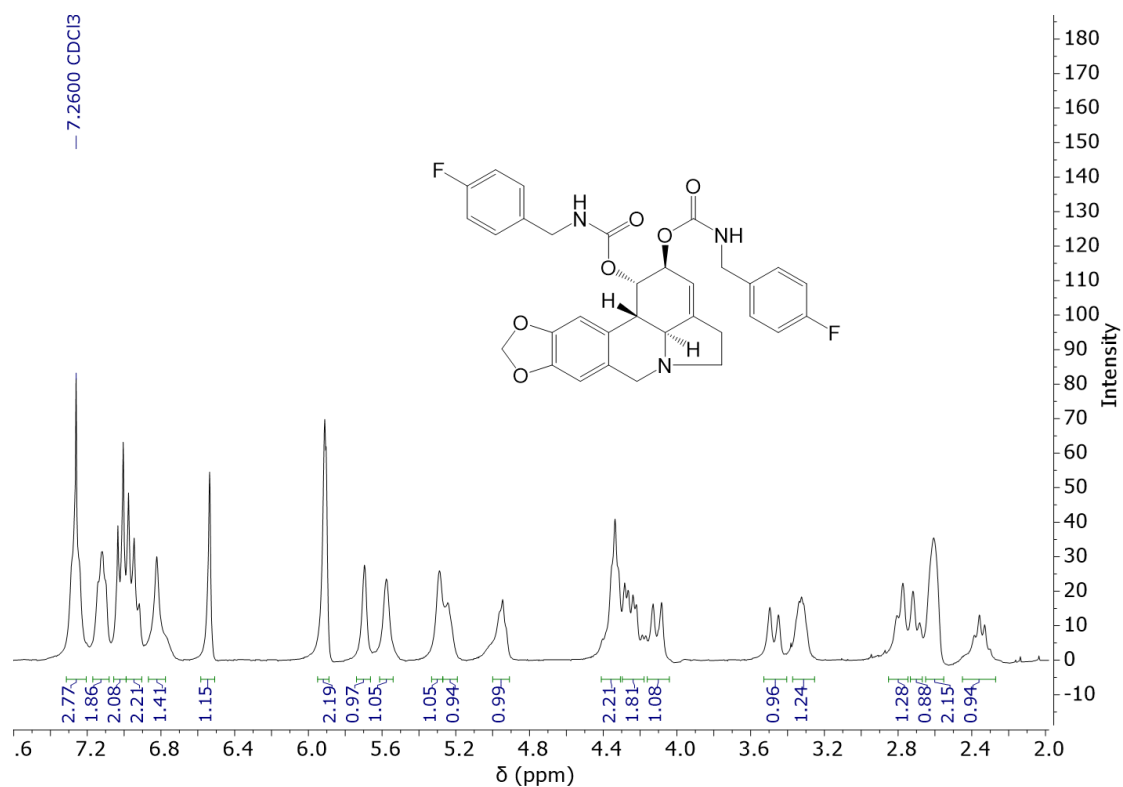

**Figure S23:** <sup>1</sup>H-NMR spectrum of compound **27** (300 MHz, CDCl<sub>3</sub>).

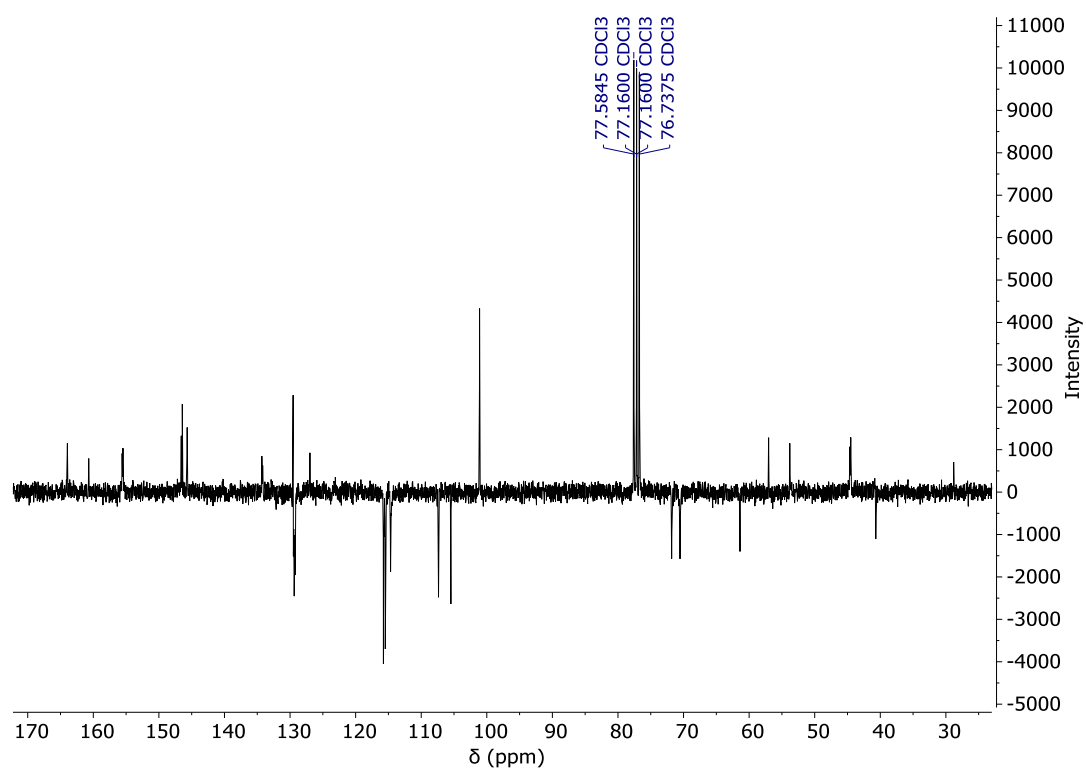

**Figure S24:** <sup>13</sup>C-APT NMR spectrum of compound **27** (75 MHz, CDCl<sub>3</sub>).

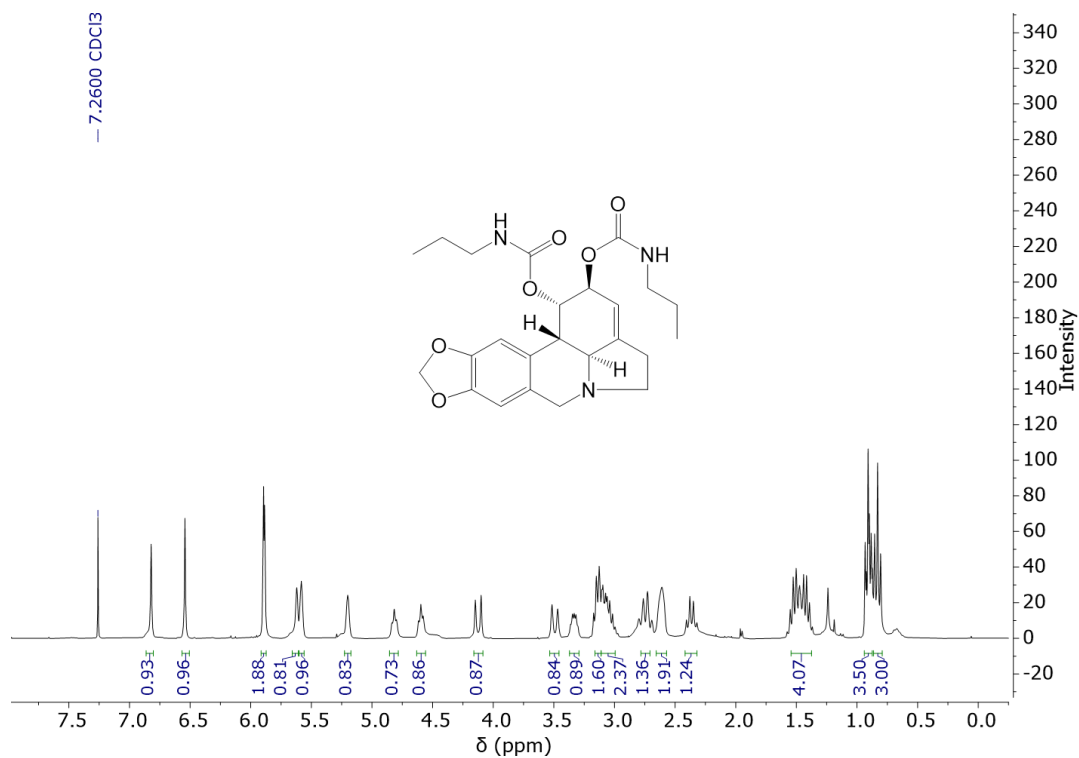

**Figure S25:** <sup>1</sup>H-NMR spectrum of compound **29** (300 MHz, CDCl<sub>3</sub>).

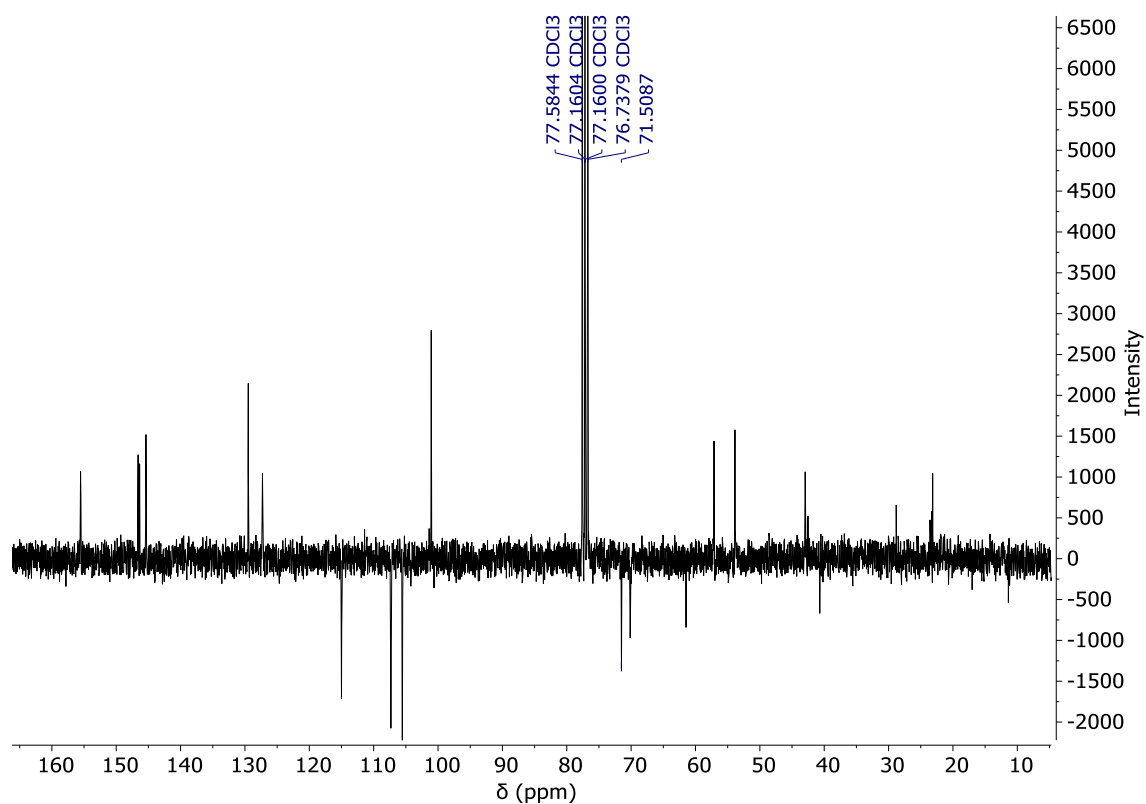

**Figure S26:** <sup>13</sup>C-APT NMR spectrum of compound **29** (75 MHz, CDCl<sub>3</sub>).



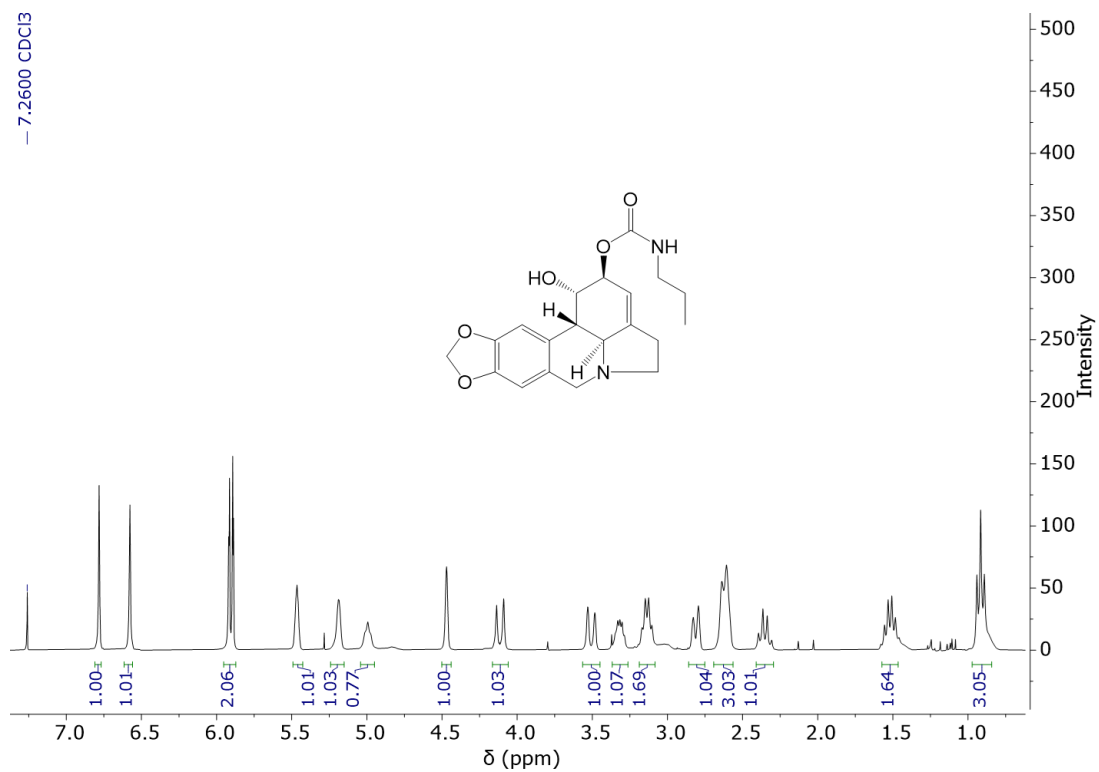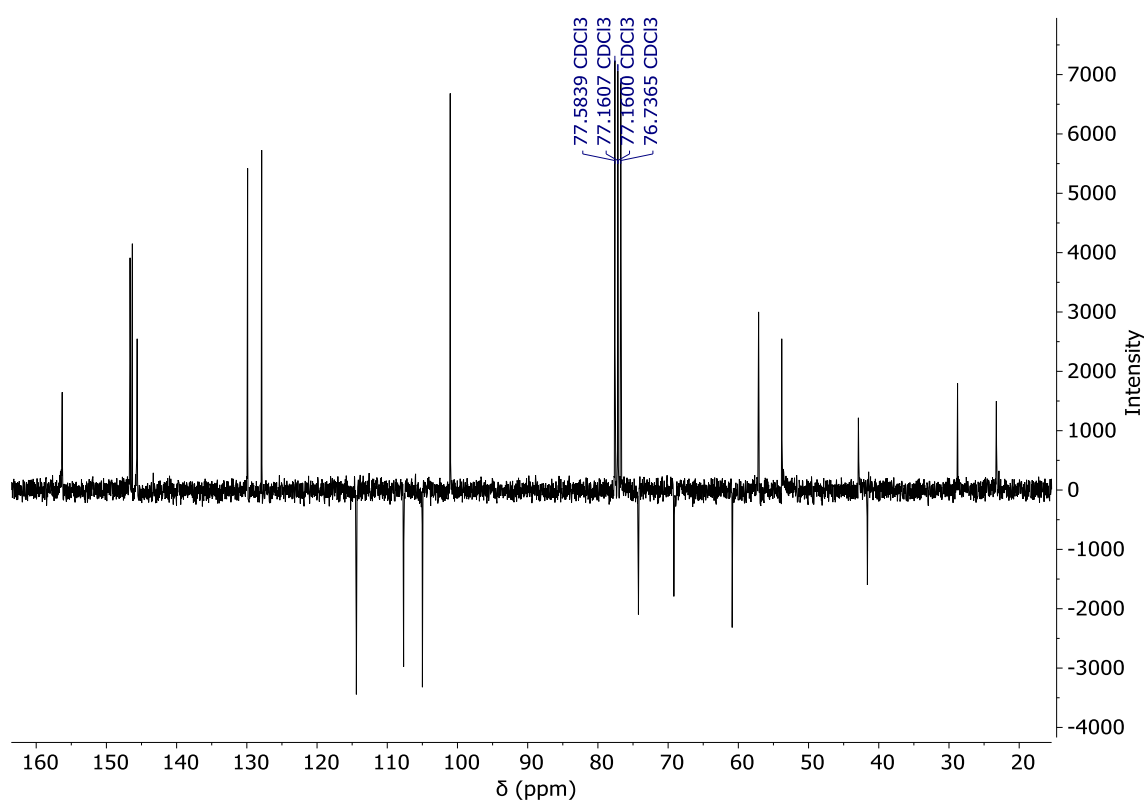

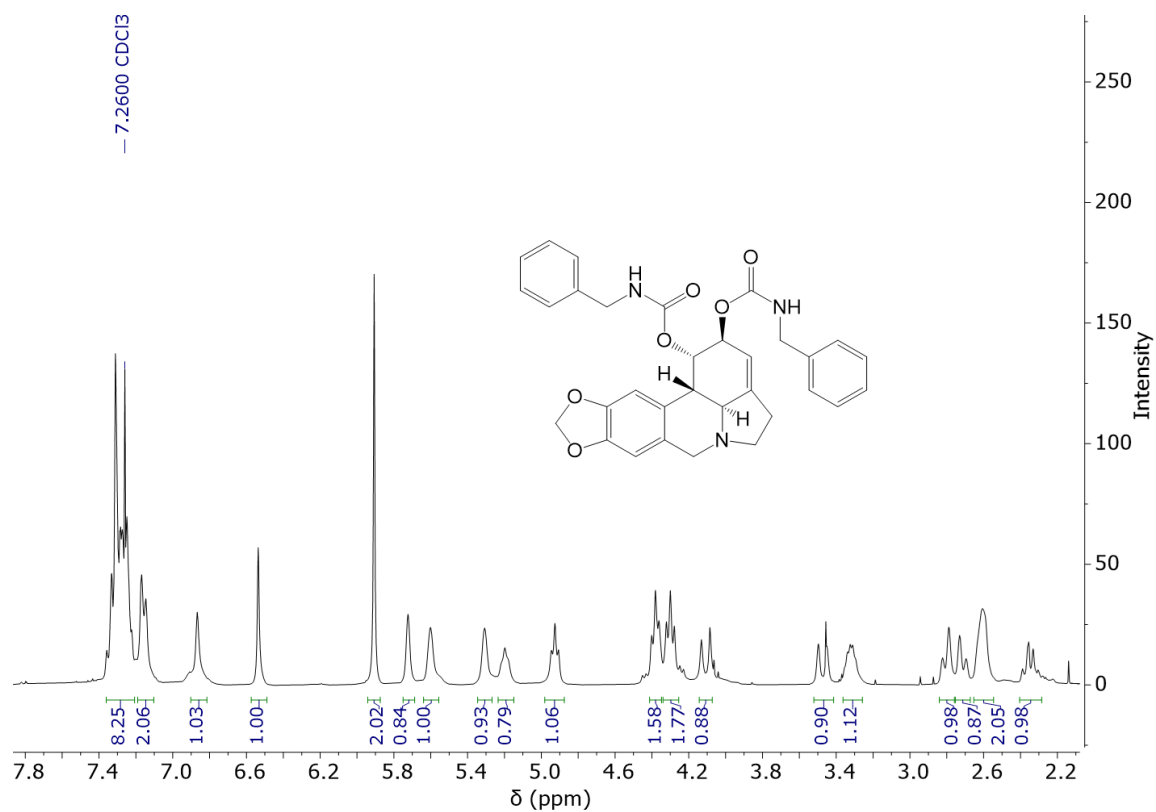

**Figure S29:** <sup>1</sup>H-NMR spectrum of compound **32** (300 MHz, CDCl<sub>3</sub>).

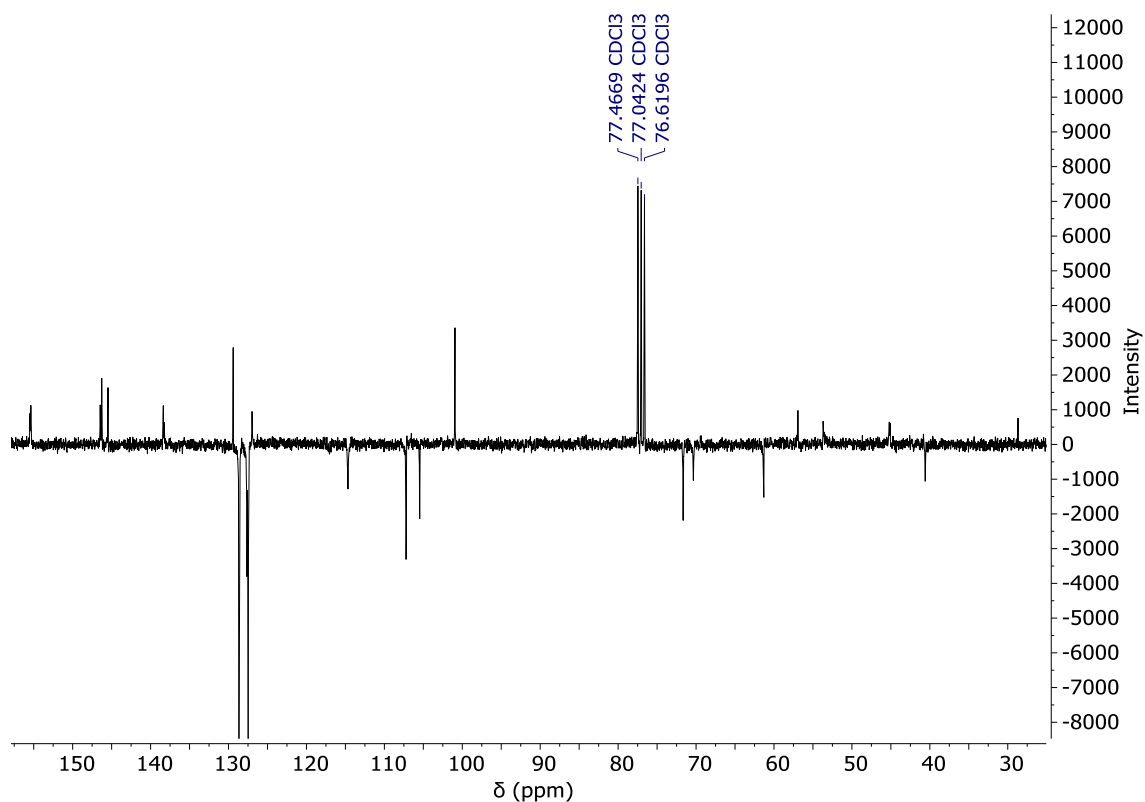

**Figure S30:** <sup>13</sup>C-NMR spectrum of compound **29** (75 MHz, CDCl<sub>3</sub>).

### 3. Rhodamine-123 accumulation assay (compounds 1 – 32)

**Table S1:** P-gp inhibitory activity of compounds 1 – 32 on multidrug resistant human adenocarcinoma cells Colo320.

| 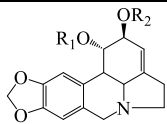 |                |                                                                                     |           |                  |                  |                  |                   |
|-----------------------------------------------------------------------------------|----------------|-------------------------------------------------------------------------------------|-----------|------------------|------------------|------------------|-------------------|
| Compound                                                                          | R <sub>1</sub> | R <sub>2</sub>                                                                      | Conc (μM) | FAR <sup>a</sup> | FSC <sup>b</sup> | SSC <sup>c</sup> | FL-1 <sup>d</sup> |
| Colo205                                                                           | -              | -                                                                                   | -         | -                | 2141             | 758              | 107.0             |
| Colo320                                                                           | -              | -                                                                                   | -         | -                | 1993             | 1048             | 4.10              |
| 1                                                                                 | Lycorine       |                                                                                     | 0.2       | 1.70             | 2056             | 1066             | 9.88              |
|                                                                                   |                |                                                                                     | 2         | 1.74             | 2048             | 1074             | 7.75              |
|                                                                                   |                |                                                                                     | 20        | 1.31             | 1991             | 1063             | 5.83              |
| 2                                                                                 | H              |    | 2         | 3.04             | 2000             | 1037             | 13.50             |
|                                                                                   |                |                                                                                     | 20        | 7.76             | 1977             | 1041             | 34.40             |
| 3                                                                                 | H              |    | 2         | 1.58             | 1995             | 1039             | 7.01              |
|                                                                                   |                |                                                                                     | 20        | 1.63             | 1965             | 1038             | 7.26              |
| 4                                                                                 |                |    | 2         | 1.75             | 2009             | 1033             | 7.77              |
|                                                                                   |                |                                                                                     | 20        | 3.20             | 1984             | 1064             | 14.20             |
| 5                                                                                 |                |   | 2         | 9.93             | 1733             | 916              | 45.80             |
|                                                                                   |                |                                                                                     | 20        | 16.41            | 1707             | 933              | 77.90             |
| 6                                                                                 | H              |  | 2         | 1.44             | 1745             | 920              | 7.25              |
|                                                                                   |                |                                                                                     | 20        | 1.57             | 1742             | 328              | 11.6              |
| 7                                                                                 |                |  | 2         | 4.40             | 1767             | 1048             | 17.60             |
|                                                                                   |                |                                                                                     | 20        | 10.66            | 1727             | 1082             | 42.60             |
| 8                                                                                 | H              |  | 2         | 1.15             | 1732             | 899              | 5.77              |
|                                                                                   |                |                                                                                     | 20        | 1.34             | 17.31            | 947              | 6.73              |
| 9                                                                                 |                |  | 2         | 12.7             | 1933             | 1012             | 56.60             |
|                                                                                   |                |                                                                                     | 20        | 17.92            | 1980             | 1053             | 73.60             |
| 10                                                                                | H              |  | 2         | 1.24             | 1750             | 909              | 6.22              |
|                                                                                   |                |                                                                                     | 20        | 1.65             | 1807             | 917              | 12.50             |
| 11                                                                                | H              |  | 2         | 1.17             | 1760             | 919              | 5.90              |
|                                                                                   |                |                                                                                     | 20        | 3.52             | 1748             | 934              | 17.70             |
| 12                                                                                | H              |  | 2         | 1.26             | 1755             | 911              | 6.33              |
|                                                                                   |                |                                                                                     | 20        | 4.70             | 1723             | 927              | 23.60             |
| 13                                                                                | H              |  | 2         | 1.12             | 1758             | 943              | 5.66              |
|                                                                                   |                |                                                                                     | 20        | 2.69             | 1716             | 952              | 13.50             |
| 14                                                                                |                |  | 2         | 1.11             | 1743             | 958              | 5.60              |
|                                                                                   |                |                                                                                     | 20        | 1.35             | 17.33            | 965              | 6.80              |
| 15                                                                                | H              |  | 2         | 0.94             | 1747             | 943              | 4.73              |
|                                                                                   |                |                                                                                     | 20        | 0.84             | 1738             | 908              | 4.22              |
| 16                                                                                |                |  | 2         | 1.49             | 1979             | 1038             | 6.64              |
|                                                                                   |                |                                                                                     | 20        | 3.77             | 1989             | 1070             | 16.70             |

Table S1: Continuation

| 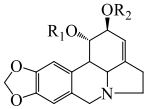 |                                                                                     |                                                                                     |           |                  |                  |                  |                   |
|-----------------------------------------------------------------------------------|-------------------------------------------------------------------------------------|-------------------------------------------------------------------------------------|-----------|------------------|------------------|------------------|-------------------|
| Compound                                                                          | R <sub>1</sub>                                                                      | R <sub>2</sub>                                                                      | Conc (μM) | FAR <sup>a</sup> | FSC <sup>b</sup> | SSC <sup>c</sup> | FL-1 <sup>d</sup> |
| 17                                                                                | H                                                                                   |    | 2         | 1.26             | 1759             | 930              | 6.73              |
|                                                                                   |                                                                                     |                                                                                     | 20        | 1.17             | 1711             | 940              | 5.89              |
| 18                                                                                |    |    | 2         | 3.45             | 1783             | 1077             | 13.80             |
|                                                                                   |                                                                                     |                                                                                     | 20        | 8.36             | 17.40            | 1099             | 33.40             |
| 19                                                                                | H                                                                                   |    | 2         | 1.83             | 1950             | 1037             | 12.70             |
|                                                                                   |                                                                                     |                                                                                     | 20        | 7.17             | 2004             | 1081             | 31.80             |
| 20                                                                                |    |    | 2         | 5.08             | 1773             | 1053             | 20.30             |
|                                                                                   |                                                                                     |                                                                                     | 20        | 13.01            | 1736             | 1012             | 52.00             |
| 21                                                                                | H                                                                                   |    | 2         | 1.16             | 1788             | 1079             | 4.60              |
|                                                                                   |                                                                                     |                                                                                     | 20        | 2.82             | 1739             | 1040             | 11.30             |
| 22                                                                                |    |    | 2         | 5.43             | 1760             | 1115             | 21.70             |
|                                                                                   |                                                                                     |                                                                                     | 20        | 13.04            | 1770             | 1119             | 52.10             |
| 23                                                                                |    |    | 2         | 6.93             | 1766             | 1091             | 27.70             |
|                                                                                   |                                                                                     |                                                                                     | 20        | 14.84            | 1753             | 1106             | 59.30             |
| 24                                                                                | H                                                                                   |  | 2         | 1.53             | 1787             | 1146             | 59.30             |
|                                                                                   |                                                                                     |                                                                                     | 20        | 4.33             | 1787             | 1146             | 6.15              |
| 25                                                                                |  |  | 2         | 15.84            | 1980             | 1034             | 64.90             |
|                                                                                   |                                                                                     |                                                                                     | 20        | 21.78            | 1944             | 1101             | 87.00             |
| 26                                                                                | H                                                                                   |  | 2         | 1.76             | 1992             | 1061             | 7.81              |
|                                                                                   |                                                                                     |                                                                                     | 20        | 6.50             | 2008             | 1085             | 28.80             |
| 27                                                                                |  |  | 2         | 4.70             | 1787             | 1068             | 18.80             |
|                                                                                   |                                                                                     |                                                                                     | 20        | 11.41            | 1754             | 1056             | 45.60             |
| 28                                                                                | H                                                                                   |  | 2         | 1.15             | 1783             | 1069             | 4.60              |
|                                                                                   |                                                                                     |                                                                                     | 20        | 1.20             | 1738             | 1049             | 4.82              |
| 29                                                                                |  |  | 2         | 1.03             | 1782             | 1077             | 4.15              |
|                                                                                   |                                                                                     |                                                                                     | 20        | 0.95             | 1699             | 1005             | 3.82              |
| 30                                                                                | H                                                                                   |  | 2         | 1.05             | 1780             | 1078             | 4.22              |
|                                                                                   |                                                                                     |                                                                                     | 20        | 0.77             | 1785             | 1114             | 3.09              |
| 31                                                                                | H                                                                                   |  | 2         | 0.85             | 1815             | 1114             | 3.43              |
|                                                                                   |                                                                                     |                                                                                     | 20        | 2.70             | 1774             | 1097             | 10.80             |
| 32                                                                                |  |  | 2         | 2.52             | 1773             | 1046             | 10.10             |
|                                                                                   |                                                                                     |                                                                                     | 20        | 9.48             | 1757             | 1066             | 37.90             |
| Verapamil                                                                         | -                                                                                   | -                                                                                   | 20        | 7.78             | 1781             | 1074             | 31.10             |

<sup>a</sup>FAR (fluorescence activity ratio) values were determined by using the equation shown in section 3.4.4. Verapamil at 20μM was used as positive control. DMSO 2% (negative control) FAR = 0.89;

<sup>b</sup>FSC: Forward scatter count of cells in the sample; <sup>c</sup>SSC: Side scatter count of cells in the sample;

<sup>d</sup>FL-1: Mean fluorescence intensity of the cells.

#### 4. Flow cytometry data

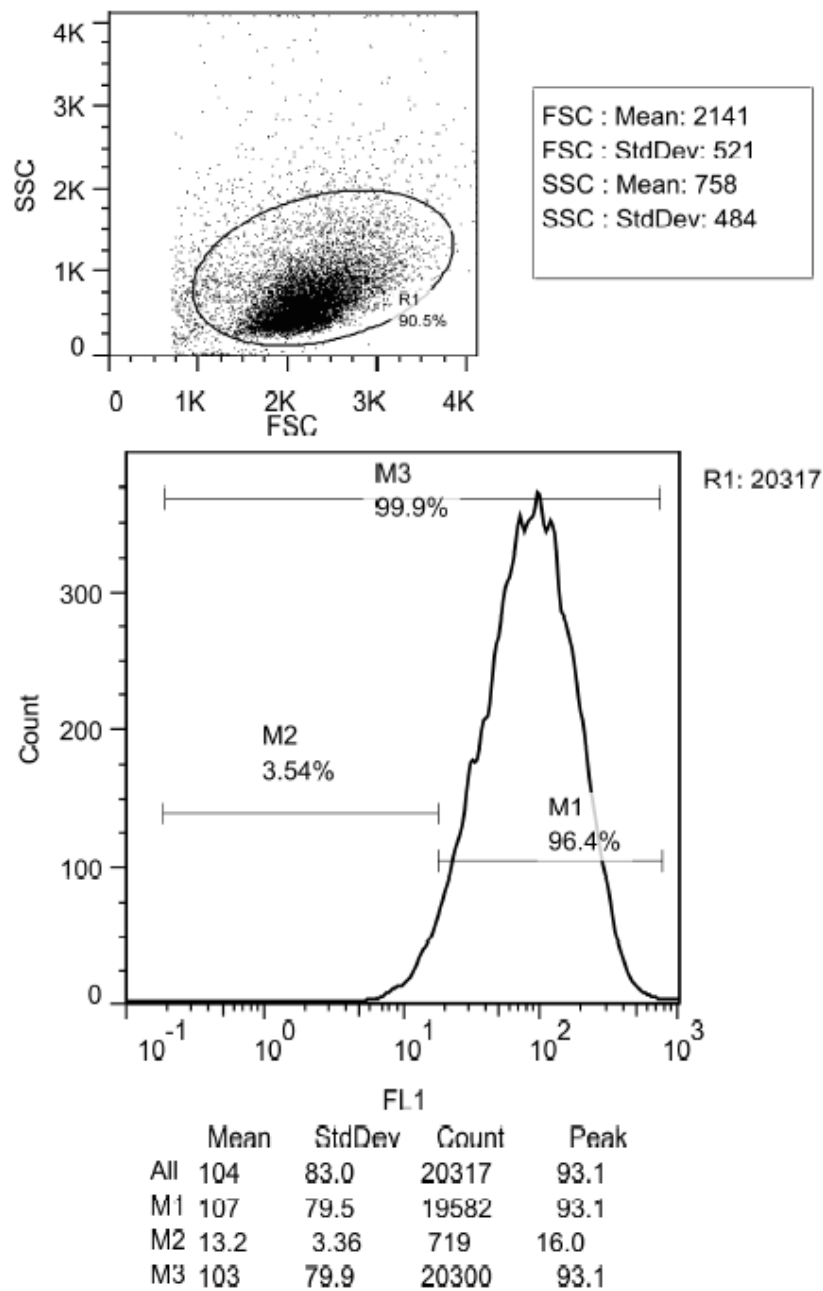

**Figure S31:** Flow cytometry data for sensitive human colon adenocarcinoma cells (Colo205).

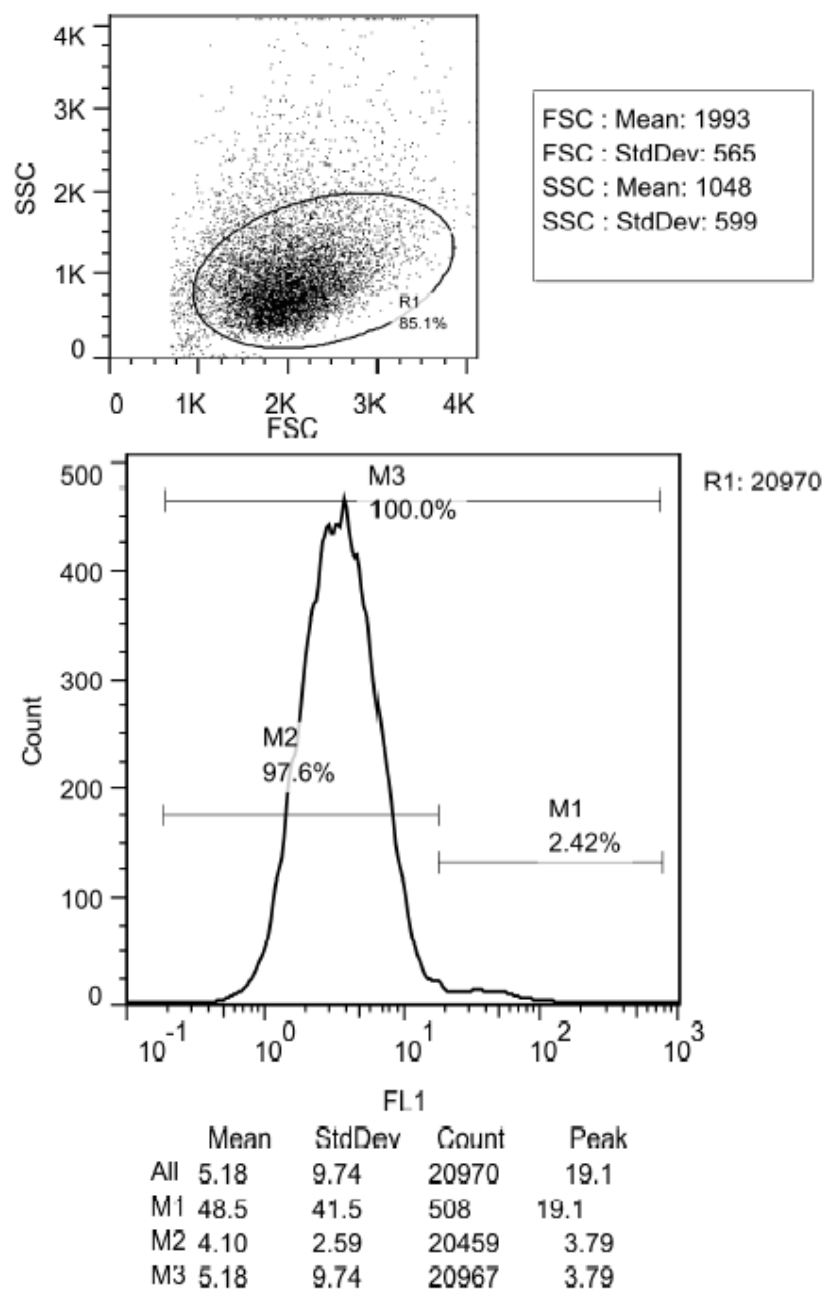

**Figure S32:** Flow cytometry data for resistant human colon adenocarcinoma cells (Colo320).

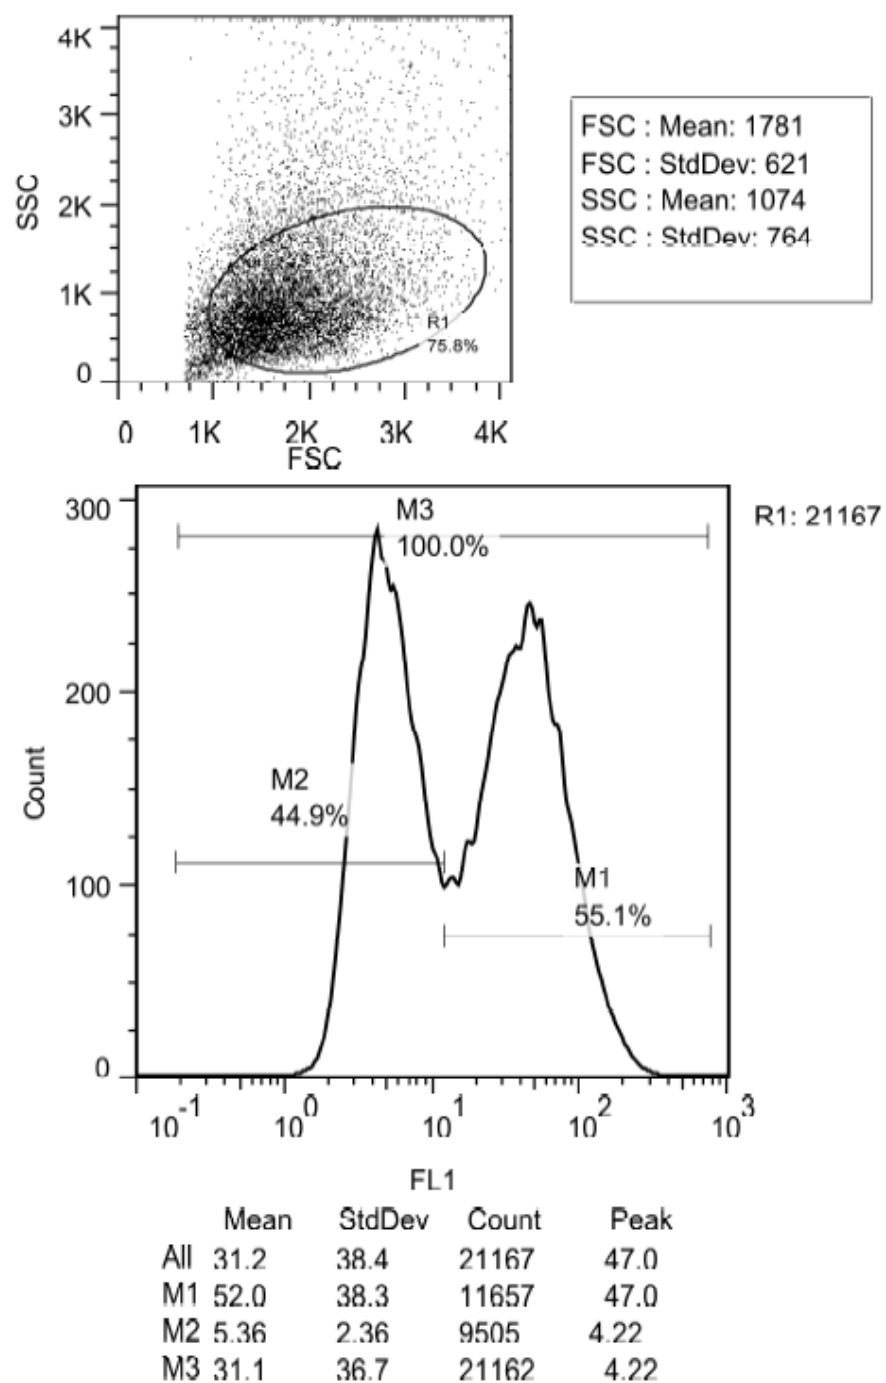

**Figure S33:** Flow cytometry data for verapamil (positive control) tested at 20  $\mu$ M in resistant human colon adenocarcinoma cells (Colo 320).

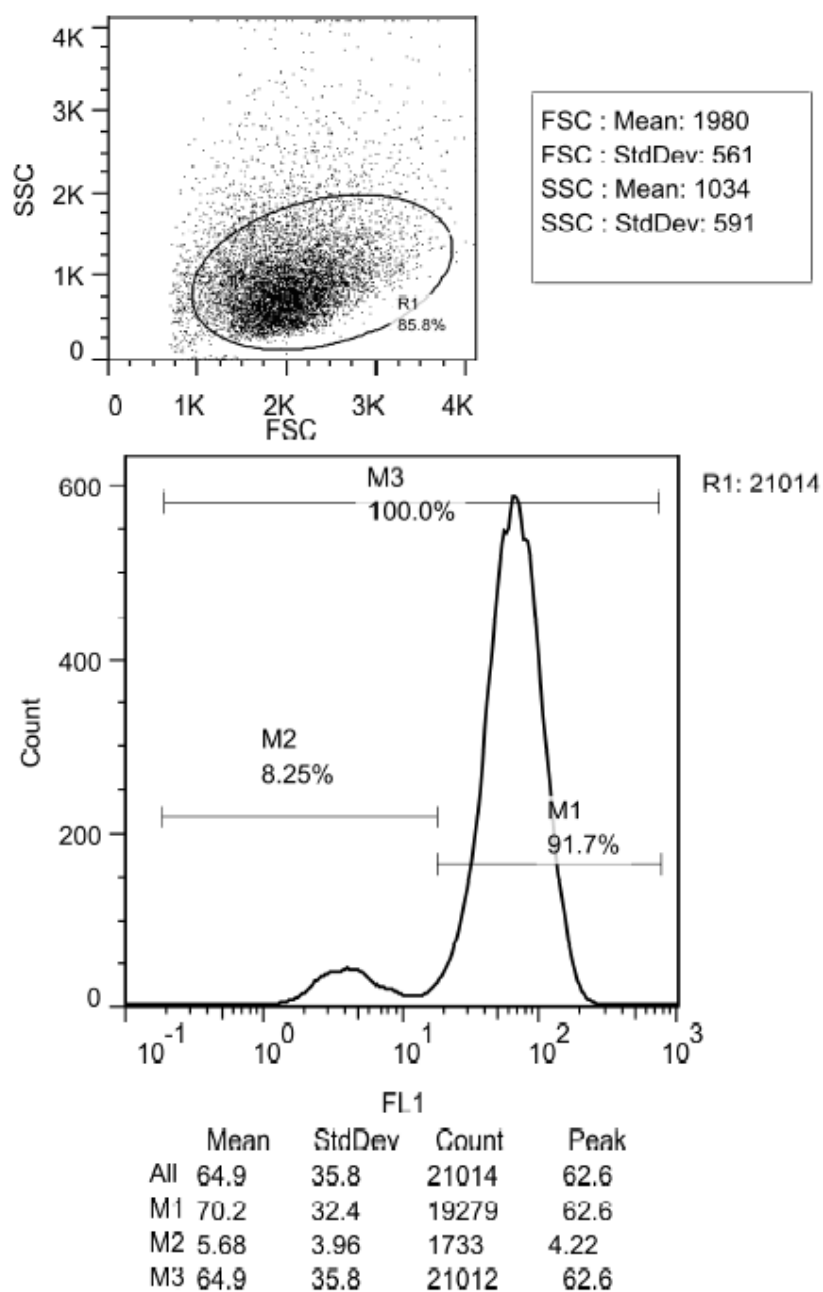

**Figure S34:** Flow cytometry data for compound **25** tested at 2  $\mu$ M in resistant human colon adenocarcinoma cells (Colo320).



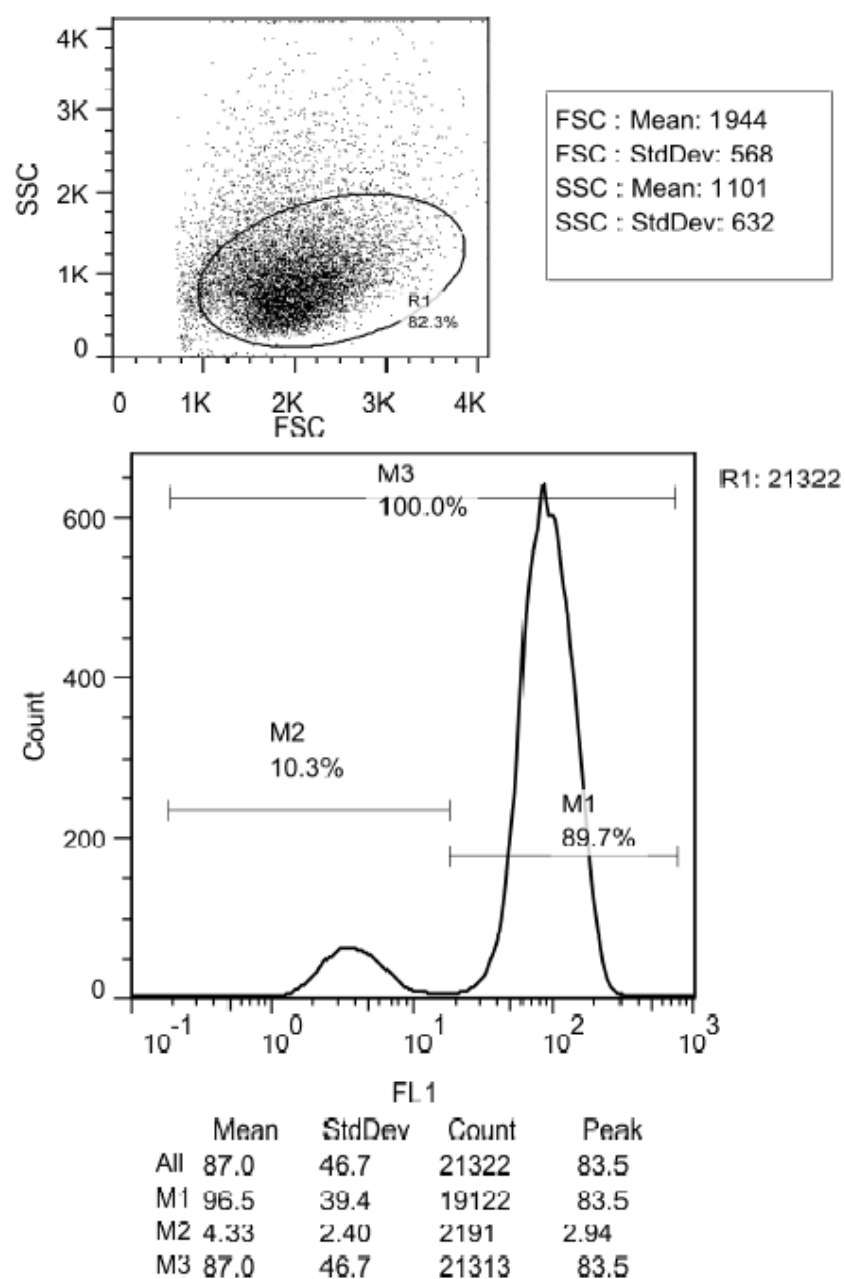

**Figure S35:** Flow cytometry data for compound **25** tested at 20  $\mu$ M in resistant human colon adenocarcinoma cells (Colo320).

## 6. Combination chemotherapy results

**Table S2:** Effect of compounds **1**, **2**, **5**, **9**, **13**, **16**, **19**, **25**, and **26** in combination with doxorubicin on human adenocarcinoma cancer cell (Colo320).

| Compound  | Starting Conc. ( $\mu\text{M}$ ) | Ratio*  | CI at $\text{IC}_{50}$ | SD    | Type of interaction |
|-----------|----------------------------------|---------|------------------------|-------|---------------------|
| <b>1</b>  | 2                                | 1:1.68  | 1.33                   | 0.19  | Moderate antagonism |
| <b>2</b>  | 80                               | 1:37.4  | 0.88                   | 0.08  | Slight synergism    |
| <b>5</b>  | 65                               | 1:60.7  | 0.13                   | 0.014 | Strong synergism    |
| <b>9</b>  | 20                               | 1:19    | 0.56                   | 0.099 | Synergism           |
| <b>13</b> | 156                              | 1:289.6 | 0.69                   | 0.089 | Synergism           |
| <b>16</b> | 54                               | 1:49.3  | 0.57                   | 0.20  | Synergism           |
| <b>19</b> | 15                               | 1:28.3  | 0.88                   | 0.20  | Slight synergism    |
| <b>25</b> | 6                                | 1:5.8   | 0.50                   | 0.05  | Synergism           |
| <b>26</b> | 76                               | 1:35.1  | 0.88                   | 0.18  | Slight synergism    |

\*Ratio: the applied combination and concentration of carbamates derivatives and doxorubicin. CI at  $\text{IC}_{50}$ : combination index (CI) at the 50 % growth inhibition dose ( $\text{IC}_{50}$ ).  $\text{CI} < 0.1$ : very strong synergism;  $0.1 < \text{CI} < 0.3$ : strong synergism;  $0.3 < \text{CI} < 0.7$ : synergism;  $0.7 < \text{CI} < 0.9$ : moderate to slight synergism;  $0.9 < \text{CI} < 1.1$ : nearly additive;  $1.10 < \text{CI} < 1.45$ : moderate antagonism;  $1.45 < \text{CI} < 3.30$ : antagonism.

## 7. Physicochemical properties

**Table S3:** Physicochemical properties of compounds **1 – 32**.

| Compounds | TPSA   | MW     | Log <i>P</i> | N° H      |         | MV     |
|-----------|--------|--------|--------------|-----------|---------|--------|
|           |        |        |              | Acceptors | Donnors |        |
| <b>1</b>  | 62.16  | 287.31 | 0.74         | 5         | 2       | 249.40 |
| <b>2</b>  | 80.27  | 454.91 | 3.33         | 6         | 2       | 383.50 |
| <b>3</b>  | 80.71  | 400.43 | 1.22         | 7         | 1       | 347.48 |
| <b>4</b>  | 116.84 | 641.72 | 4.71         | 9         | 2       | 575.22 |
| <b>5</b>  | 98.37  | 581.67 | 5.23         | 7         | 2       | 523.65 |
| <b>6</b>  | 80.27  | 434.49 | 2.99         | 6         | 2       | 386.52 |
| <b>7</b>  | 135.31 | 641.63 | 4.07         | 11        | 2       | 538.38 |
| <b>8</b>  | 98.73  | 464.47 | 2.41         | 8         | 2       | 393.89 |
| <b>9</b>  | 98.37  | 581.16 | 4.70         | 7         | 2       | 524.13 |
| <b>10</b> | 80.27  | 434.49 | 2.72         | 6         | 2       | 386.76 |
| <b>11</b> | 98.50  | 450.49 | 2.69         | 7         | 2       | 395.51 |
| <b>12</b> | 71.48  | 434.49 | 3.02         | 6         | 1       | 386.91 |
| <b>13</b> | 71.48  | 446.50 | 2.95         | 6         | 1       | 393.11 |
| <b>14</b> | 80.79  | 481.54 | 3.22         | 7         | 0       | 427.60 |
| <b>15</b> | 71.48  | 384.43 | 1.98         | 6         | 1       | 338.50 |
| <b>16</b> | 80.79  | 509.60 | 4.0          | 7         | 0       | 461.20 |
| <b>17</b> | 71.48  | 398.45 | 2.37         | 6         | 1       | 355.30 |
| <b>18</b> | 98.37  | 665.83 | 7.21         | 7         | 2       | 622.90 |
| <b>19</b> | 80.27  | 476.57 | 3.98         | 6         | 2       | 436.15 |
| <b>20</b> | 98.37  | 589.59 | 4.89         | 7         | 2       | 500.39 |
| <b>21</b> | 80.27  | 438.45 | 2.82         | 6         | 2       | 374.89 |
| <b>22</b> | 98.37  | 689.60 | 6.65         | 7         | 2       | 553.12 |
| <b>23</b> | 98.37  | 617.64 | 4.98         | 7         | 2       | 533.99 |
| <b>24</b> | 80.27  | 452.48 | 2.86         | 6         | 2       | 391.70 |
| <b>25</b> | 98.37  | 650.55 | 6.00         | 7         | 2       | 551.20 |
| <b>26</b> | 80.27  | 468.93 | 3.37         | 6         | 2       | 400.30 |
| <b>27</b> | 98.37  | 589.59 | 4.89         | 7         | 2       | 500.39 |
| <b>28</b> | 80.27  | 438.45 | 2.82         | 6         | 2       | 374.89 |
| <b>29</b> | 98.37  | 457.52 | 3.03         | 7         | 2       | 414.44 |
| <b>30</b> | 80.27  | 372.42 | 1.89         | 6         | 2       | 331.92 |
| <b>31</b> | 80.71  | 464.51 | 3.03         | 7         | 1       | 412.45 |
| <b>32</b> | 98.37  | 4.61   | 4.62         | 7         | 2       | 490.53 |

TPSA, MW, and MV were determined by using Molinspiration Cheminformatics (version September 2022, <https://www.molinspiration.com/cgi-bin/properties>).

Log *P* was determined by using pkCSM software (version September 2022, <https://biosig.lab.uq.edu.au/pkcsml/prediction>) [1].

## 8. Pharmacokinetic properties

**Table S4:** Calculated pharmacokinetic properties of verapamil and compounds 2 – 32.

| Compounds | Log S<br>(mol/L) | Caco-2<br>Permeability<br>(log Papp in 10 <sup>-6</sup> cm/s) | Intestinal<br>absorption<br>(%) | Fractional<br>unbound<br>(fu) | CNS<br>permeability<br>(log PS) | CYP3A4<br>inhibitor<br>(Yes/No) |
|-----------|------------------|---------------------------------------------------------------|---------------------------------|-------------------------------|---------------------------------|---------------------------------|
| Verapamil | – 5.13           | 1.36                                                          | 94.23                           | 0                             | – 2.49                          | Yes                             |
| 2         | – 3.79           | 1.09                                                          | 93.28                           | 0.12                          | – 2.29                          | No                              |
| 3         | – 2.50           | – 0.19                                                        | 52.26                           | 0.422                         | – 3.36                          | No                              |
| 4         | – 4.61           | 0.87                                                          | 91.35                           | 0.043                         | – 3.23                          | Yes                             |
| 5         | – 4.86           | 0.83                                                          | 98.6                            | 0.0                           | – 2.94                          | Yes                             |
| 6         | – 3.65           | 1.13                                                          | 94.73                           | 0.13                          | – 2.33                          | No                              |
| 7         | – 3.53           | 1.04                                                          | 97.6                            | 0.15                          | – 3.47                          | Yes                             |
| 8         | – 3.52           | 0.96                                                          | 93.51                           | 0.15                          | – 3.31                          | Yes                             |
| 9         | – 4.58           | 1.01                                                          | 100                             | 0.008                         | – 2.79                          | Yes                             |
| 10        | – 3.78           | 0.99                                                          | 95.18                           | 0.089                         | – 2.48                          | Yes                             |
| 11        | – 3.67           | 1.055                                                         | 95.62                           | 0.151                         | – 3.18                          | Yes                             |
| 12        | – 3.72           | 0.99                                                          | 94.45                           | 0.10                          | – 2.32                          | No                              |
| 13        | – 3.39           | 1.05                                                          | 95.02                           | 0.12                          | – 2.17                          | No                              |
| 14        | – 3.20           | 1.19                                                          | 95.05                           | 0.33                          | – 3.23                          | No                              |
| 15        | – 2.45           | 1.07                                                          | 95.94                           | 0.39                          | – 2.51                          | No                              |
| 16        | – 3.48           | 1.09                                                          | 94.27                           | 0.30                          | – 3.08                          | Yes                             |
| 17        | – 2.67           | 1.07                                                          | 95.56                           | 0.37                          | – 2.42                          | No                              |
| 18        | – 4.45           | 0.96                                                          | 100                             | 0.046                         | – 2.50                          | Yes                             |
| 19        | – 4.40           | 1.07                                                          | 93.16                           | 0.026                         | – 2.09                          | Yes                             |
| 20        | – 4.58           | 1.01                                                          | 100                             | 0.008                         | – 3.10                          | Yes                             |
| 21        | – 3.71           | 1.03                                                          | 93.8                            | 0.106                         | – 3.10                          | No                              |
| 22        | – 4.65           | 0.84                                                          | 95.2                            | 0.0                           | – 2.79                          | Yes                             |
| 23        | – 4.92           | 0.94                                                          | 100                             | 0.10                          | – 3.10                          | Yes                             |
| 24        | – 3.90           | 1.01                                                          | 94.6                            | 0.13                          | – 3.13                          | Yes                             |
| 25        | – 4.92           | 0.82                                                          | 100                             | 0.0                           | – 2.82                          | Yes                             |
| 26        | – 3.98           | 1.09                                                          | 93.80                           | 0.10                          | – 2.37                          | Yes                             |
| 27        | – 4.61           | 0.91                                                          | 100                             | 0.10                          | – 3.09                          | Yes                             |
| 28        | – 3.71           | 0.98                                                          | 94.13                           | 0.16                          | – 3.11                          | Yes                             |
| 29        | – 3.53           | 0.90                                                          | 94.91                           | 0.30                          | – 3.27                          | Yes                             |
| 30        | – 2.61           | 1.04                                                          | 95.67                           | 0.37                          | – 2.69                          | No                              |
| 31        | – 3.78           | 1.07                                                          | 95.41                           | 0.14                          | – 3.12                          | Yes                             |
| 32        | – 4.61           | 1.07                                                          | 100                             | 0                             | – 2.95                          | Yes                             |

Pharmacokinetic values were obtained using pkCSM software after conversion SMILES format, as described by Pires et al. [2]

## 9. References

1. Pires, D.E. V.; Blundell, T.L.; Ascher, D.B. PkCSM: Predicting Small-Molecule Pharmacokinetic and Toxicity Properties Using Graph-Based Signatures. *J. Med. Chem.* **2015**, *58*, 4066–4072.
